# Supplementary material for: Genome-wide analysis of methylation in giant pandas with cataract by methylation-dependent restriction-site associated DNA sequencing (MethylRAD)
Source: PLoS One. 2019 Sep 25;14(9):e0222292. doi: 10.1371/journal.pone.0222292 (PMC6760787; doi:10.1371/journal.pone.0222292)
Supplement: S4 Table — (XLSX) [file pone.0222292.s004.xlsx]

## Sheet: GO.table.db
GO_id	GO_def	dis	dis_gene	category	CCGG_pval	CCWGG_pval	CCGG_gene	CCGG_Up	CCGG_Down	CCWGG_gene	CCWGG_Up	CCWGG_Down
GO:0010564	regulation of cell cycle process	NA	NA	biological_process	0.000160215	0.000968205	SOX9	0	1	TXLNG	1	0
GO:0007492	endoderm development	NA	NA	biological_process	0.00142404	0.00830639	NKX2-5	1	0	NKX2-5	1	0
GO:0045737	positive regulation of cyclin-dependent protein serine/threonine kinase activity	NA	NA	biological_process	0.00163884	0.00952199	LOC100472465	0	1	PSMD10	0	1
GO:0060261	positive regulation of transcription initiation from RNA polymerase II promoter	NA	NA	biological_process	0.000160215	0.000968205	NKX2-5	1	0	NKX2-5	1	0
GO:0001947	heart looping	NA	NA	biological_process	0.0078636	0.00425897	NKX2-5	1	0	SOX17;NKX2-5	1	1
GO:0008301	DNA binding, bending	NA	NA	molecular_function	0.000711596	0.00421635	HMGB1	0	1	TOP2B	1	0
GO:0060929	atrioventricular node cell fate commitment	NA	NA	biological_process	0	0	NKX2-5	1	0	NKX2-5	1	0
GO:0005882	intermediate filament	Cataract, Nuclear Diffuse Nonprogressive;Cataract, Cortical, Juvenile-Onset;Cataract, Autosomal Dominant, Multiple Types 1;Cataract	BFSP2;BFSP1;VIM	cellular_component	0.0261278	0.0239497	LOC105240942	1	0	LOC100465932;LOC105240942	2	0
GO:0008134	transcription factor binding	NA	NA	molecular_function	0.0180836	0.0120513	HMGB1;NKX2-5	1	1	PSMD10;SOX17;PPRC1;NKX2-5	2	2
GO:0048738	cardiac muscle tissue development	CATARACT 43	UNC45B	biological_process	0.000445093	0.00265811	NKX2-5	1	0	NKX2-5	1	0
GO:0051891	positive regulation of cardioblast differentiation	NA	NA	biological_process	9.63811e-05	0.000584755	NKX2-5	1	0	NKX2-5	1	0
GO:1903352	L-ornithine transmembrane transport	NA	NA	biological_process	0.000445093	0.00265811	LOC100473749	1	0	LOC100473749	1	0
GO:0055005	ventricular cardiac myofibril assembly	NA	NA	biological_process	4.83169e-05	0.000294308	NKX2-5	1	0	NKX2-5	1	0
GO:0010832	negative regulation of myotube differentiation	NA	NA	biological_process	0.000570767	0.00339525	NKX2-5	1	0	NKX2-5	1	0
GO:0048536	spleen development	NA	NA	biological_process	0.00456188	0.0254952	NKX2-5	1	0	NKX2-5	1	0
GO:0031145	anaphase-promoting complex-dependent proteasomal ubiquitin-dependent protein catabolic process	NA	NA	biological_process	0.00652924	0.0357942	UBE2C	0	1	PSMD10	0	1
GO:0042127	regulation of cell proliferation	NA	NA	biological_process	0.0435891	0.0486336	SOX9	0	1	EGLN3;SCGB3A1	2	0
GO:0007512	adult heart development	NA	NA	biological_process	0.000160215	0.000968205	NKX2-5	1	0	NKX2-5	1	0
GO:0055007	cardiac muscle cell differentiation	Cataract	0	biological_process	0.00420788	0.0236078	NKX2-5	1	0	NKX2-5	1	0
GO:0055015	ventricular cardiac muscle cell development	NA	NA	biological_process	0.000334694	0.0020067	NKX2-5	1	0	NKX2-5	1	0
GO:0007283	spermatogenesis	HEMORRHAGIC DESTRUCTION OF THE BRAIN, SUBEPENDYMAL CALCIFICATION, AND CATARACTS;CATARACT 36;Cataract	TDRD7;JAM3	biological_process	0.00351856	0.0406697	SOX9;LOC105234993;LOC105234994;LOC100470566	2	2	ACVR2A;TUBD1;SOX17;LOC105234994;ASPM	4	1
GO:0001190	transcriptional activator activity, RNA polymerase II transcription factor binding	NA	NA	molecular_function	0.000711596	0.00421635	NKX2-5	1	0	NKX2-5	1	0
GO:0043565	sequence-specific DNA binding	Cataracts, Congenital, with Sensorineural Deafness, Down Syndrome-Like Facial Appearance, Short Stature, and Mental Retardation;Cataract, posterior polar, 4;Cataract, zonular;Cataract, Pulverulent, Juvenile-Onset;Cataract;Cataract, Autosomal Recessive Congenital 3	HSF4;PITX3;MAF;FOXE3	molecular_function	0.0104991	0.0462972	SOX9;FOXL2;HOXD12;NKX2-5	2	2	TLX2;HOXC6;LOC105239870;SOX17;HOXB7;NKX2-5	1	5
GO:0043586	tongue development	NA	NA	biological_process	0.000334694	0.0020067	NKX2-5	1	0	NKX2-5	1	0
GO:0032006	regulation of TOR signaling	NA	NA	biological_process	0.00186807	0.0108116	LOC100473749	1	0	LOC100473749	1	0
GO:0030878	thyroid gland development	NA	NA	biological_process	0.0012238	0.00716639	NKX2-5	1	0	NKX2-5	1	0
GO:0003151	outflow tract morphogenesis	NA	NA	biological_process	0.00570327	0.00265197	NKX2-5	1	0	SOX17;NKX2-5	1	1
GO:0003208	cardiac ventricle morphogenesis	NA	NA	biological_process	0.000239694	0.0014428	NKX2-5	1	0	NKX2-5	1	0
GO:0003285	septum secundum development	NA	NA	biological_process	0	0	NKX2-5	1	0	NKX2-5	1	0
GO:0003168	Purkinje myocyte differentiation	NA	NA	biological_process	0	0	NKX2-5	1	0	NKX2-5	1	0
GO:0046983	protein dimerization activity	Cataract	ATM	molecular_function	0.00322677	0.0183151	HMGB1	0	1	GARS	1	0
GO:0001570	vasculogenesis	Cataract;PARTIAL LIPODYSTROPHY, CONGENITAL CATARACTS, AND NEURODEGENERATION SYNDROME;CATARACT 6, MULTIPLE TYPES	CAV1;EPHA2;0	biological_process	0.0103349	0.000539043	NKX2-5	1	0	TMEM100;SOX17;NKX2-5	2	1
GO:0044798	nuclear transcription factor complex	NA	NA	cellular_component	0.000711596	0.00421635	SOX9	0	1	SOX17	0	1
GO:0005667	transcription factor complex	Cataract, Autosomal Recessive Congenital 3	FOXE3	cellular_component	0.0163928	0.0103789	SOX9;NKX2-5	1	1	MED23;SOX17;ABT1;NKX2-5	3	1
GO:0050821	protein stabilization	Cataract, Autosomal Dominant;CATARACT 41;CATARACT 16, MULTIPLE TYPES;Cataract	CRYAA;CRYAB;WFS1	biological_process	0.0407509	0.0443609	CSN3	1	0	LOC100463747;SOX17	1	1
GO:0055117	regulation of cardiac muscle contraction	NA	NA	biological_process	0.000334694	0.0020067	NKX2-5	1	0	NKX2-5	1	0
GO:0060971	embryonic heart tube left/right pattern formation	NA	NA	biological_process	0.000160215	0.000968205	NKX2-5	1	0	NKX2-5	1	0
GO:0003211	cardiac ventricle formation	NA	NA	biological_process	0.000160215	0.000968205	NKX2-5	1	0	NKX2-5	1	0
GO:0003162	atrioventricular node development	NA	NA	biological_process	1.61479e-05	9.87507e-05	NKX2-5	1	0	NKX2-5	1	0
GO:0042157	lipoprotein metabolic process	NA	NA	biological_process	4.13896e-05	2.04549e-05	LOC100476107;LOC100480217	0	2	LOC100476107;LOC100476613;LOC100480217	0	3
GO:0010735	positive regulation of transcription via serum response element binding	NA	NA	biological_process	9.63811e-05	0.000584755	NKX2-5	1	0	NKX2-5	1	0
GO:0003222	ventricular trabecula myocardium morphogenesis	NA	NA	biological_process	0.000445093	0.00265811	NKX2-5	1	0	NKX2-5	1	0
GO:0090090	negative regulation of canonical Wnt signaling pathway	Cataract;PARTIAL LIPODYSTROPHY, CONGENITAL CATARACTS, AND NEURODEGENERATION SYNDROME	CAV1;0	biological_process	0.00478143	0.000191203	SOX9;NKX2-5	1	1	LOC109489895;PSMD10;KLHL12;SOX17;NKX2-5	3	2
GO:0010765	positive regulation of sodium ion transport	NA	NA	biological_process	0.00142404	0.00830639	NKX2-5	1	0	NKX2-5	1	0
GO:0010667	negative regulation of cardiac muscle cell apoptotic process	NA	NA	biological_process	0.000239694	0.0014428	NKX2-5	1	0	NKX2-5	1	0
GO:0060047	heart contraction	Cataract	0	biological_process	0.000867457	0.00511971	NKX2-5	1	0	NKX2-5	1	0
GO:0060038	cardiac muscle cell proliferation	PARTIAL LIPODYSTROPHY, CONGENITAL CATARACTS, AND NEURODEGENERATION SYNDROME	CAV1	biological_process	0.000239694	0.0014428	NKX2-5	1	0	NKX2-5	1	0
GO:0003342	proepicardium development	NA	NA	biological_process	1.61479e-05	9.87507e-05	NKX2-5	1	0	NKX2-5	1	0
GO:0005319	lipid transporter activity	NA	NA	molecular_function	3.49863e-06	5.24759e-05	LOC100476107;LOC100480217	0	2	LOC100476107;LOC100480217	0	2
GO:0060928	atrioventricular node cell development	NA	NA	biological_process	1.61479e-05	9.87507e-05	NKX2-5	1	0	NKX2-5	1	0
GO:0030509	BMP signaling pathway	Cataract;CONGENITAL CATARACTS, HEARING LOSS, AND NEURODEGENERATION	SLC33A1	biological_process	0.0125271	0.000792502	NKX2-5	1	0	ACVR2A;TMEM100;NKX2-5	3	0
GO:0003350	pulmonary myocardium development	NA	NA	biological_process	1.61479e-05	9.87507e-05	NKX2-5	1	0	NKX2-5	1	0
GO:0003278	apoptotic process involved in heart morphogenesis	NA	NA	biological_process	0	0	NKX2-5	1	0	NKX2-5	1	0
GO:0015189	L-lysine transmembrane transporter activity	NA	NA	molecular_function	0.000445093	0.00265811	LOC100473749	1	0	LOC100473749	1	0
GO:0015297	antiporter activity	NA	NA	molecular_function	0.0083334	0.0449901	LOC100473749	1	0	LOC100473749	1	0
GO:0003007	heart morphogenesis	Cataract and cardiomyopathy;Cataract	COL2A1;SOD2	biological_process	0.00386728	0.0217811	NKX2-5	1	0	NKX2-5	1	0
GO:0003161	cardiac conduction system development	Cataract, Zonular Pulverulent 3	GJA3	biological_process	9.63811e-05	0.000584755	NKX2-5	1	0	NKX2-5	1	0
GO:0042102	positive regulation of T cell proliferation	NA	NA	biological_process	0.00696141	0.0380172	CCL19	0	1	LOC100463889	1	0
GO:0001228	transcriptional activator activity, RNA polymerase II transcription regulatory region sequence-specific binding	Cataracts, Congenital, with Sensorineural Deafness, Down Syndrome-Like Facial Appearance, Short Stature, and Mental Retardation;Cataract, zonular;Cataract, Pulverulent, Juvenile-Onset	HSF4;MAF	molecular_function	0.00158671	0.0192054	SOX9;NKX2-5	1	1	SOX17;NKX2-5	1	1
GO:0031295	T cell costimulation	PARTIAL LIPODYSTROPHY, CONGENITAL CATARACTS, AND NEURODEGENERATION SYNDROME	CAV1	biological_process	0.00386728	0.00148688	CCL19	0	1	LOC100463889;BTLA	2	0
GO:0007506	gonadal mesoderm development	NA	NA	biological_process	2.52818e-07	0.000584755	LOC105234993;LOC105234994	2	0	LOC105234994	1	0
GO:0060412	ventricular septum morphogenesis	NA	NA	biological_process	0.00163884	0.00952199	NKX2-5	1	0	NKX2-5	1	0
GO:0055008	cardiac muscle tissue morphogenesis	Cataract, Zonular Pulverulent 3	GJA3	biological_process	0.000334694	0.0020067	NKX2-5	1	0	NKX2-5	1	0
GO:0003166	bundle of His development	NA	NA	biological_process	4.83169e-05	0.000294308	NKX2-5	1	0	NKX2-5	1	0
GO:0006865	amino acid transport	NA	NA	biological_process	0.00570327	0.0315075	LOC100473749	1	0	LOC100473749	1	0
GO:0060043	regulation of cardiac muscle cell proliferation	NA	NA	biological_process	1.61479e-05	9.87507e-05	NKX2-5	1	0	NKX2-5	1	0
GO:0043491	protein kinase B signaling	CATARACT 6, MULTIPLE TYPES	EPHA2	biological_process	0.0023694	0.0136065	SOX9	0	1	TMEM100	1	0
GO:0004871	signal transducer activity	NA	NA	molecular_function	0.0225249	0.0167909	LOC100476107;LOC100480217	0	2	LOC109488611;LOC100476107;LOC100480217;GNAI1	2	2
GO:0045214	sarcomere organization	NA	NA	biological_process	0.00456188	0.0254952	NKX2-5	1	0	NKX2-5	1	0
GO:1903401	L-lysine transmembrane transport	NA	NA	biological_process	0.000445093	0.00265811	LOC100473749	1	0	LOC100473749	1	0
GO:0055014	atrial cardiac muscle cell development	NA	NA	biological_process	4.83169e-05	0.000294308	NKX2-5	1	0	NKX2-5	1	0
GO:0034364	high-density lipoprotein particle	NA	NA	cellular_component	0.00163884	0.000405019	APOC4	0	1	APOC4;LOC100468201	1	1
GO:0045860	positive regulation of protein kinase activity	Cataract	0	biological_process	0.00696141	0.0380172	CCL19	0	1	CDK5	0	1
GO:0003705	transcription factor activity, RNA polymerase II distal enhancer sequence-specific binding	NA	NA	molecular_function	0.000317071	0.00425897	SOX9;NKX2-5	1	1	SOX17;NKX2-5	1	1
GO:0070328	triglyceride homeostasis	Cataract	0	biological_process	0.00163884	0.00952199	APOC4	0	1	APOC4	0	1
GO:0034361	very-low-density lipoprotein particle	NA	NA	cellular_component	3.41844e-05	0.0108116	APOC4;LPL	1	1	APOC4	0	1
GO:0019228	neuronal action potential	NA	NA	biological_process	0.00292708	0.0166787	GPR88	1	0	SCN3A	1	0
GO:0035050	embryonic heart tube development	Cataract	0	biological_process	0.000867457	0.000151247	NKX2-5	1	0	SOX17;NKX2-5	1	1
GO:0003148	outflow tract septum morphogenesis	NA	NA	biological_process	0.000570767	0.00339525	NKX2-5	1	0	NKX2-5	1	0
GO:0060070	canonical Wnt signaling pathway	NA	NA	biological_process	0.0253502	0.0229547	NKX2-5	1	0	SOX17;NKX2-5	1	1
GO:1901203	positive regulation of extracellular matrix assembly	Cataract	0	biological_process	4.83169e-05	0.000294308	SOX9	0	1	RGCC	1	0
GO:0060048	cardiac muscle contraction	Cataract	0	biological_process	0.00530969	0.0294464	NKX2-5	1	0	NKX2-5	1	0
GO:0000064	L-ornithine transmembrane transporter activity	NA	NA	molecular_function	0.000445093	0.00265811	LOC100473749	1	0	LOC100473749	1	0
GO:0003221	right ventricular cardiac muscle tissue morphogenesis	Cataract	0	biological_process	1.61479e-05	9.87507e-05	NKX2-5	1	0	NKX2-5	1	0
GO:0008289	lipid binding	NA	NA	molecular_function	0.0113389	0.00588848	LOC100476107;LOC100480217	0	2	LOC100478332;LOC100476107;LOC100476613;LOC100480217	0	4
GO:0034504	protein localization to nucleus	Cataract	0	biological_process	0.00322677	0.0183151	SOX9	0	1	PYGO1	0	1
GO:0015181	arginine transmembrane transporter activity	NA	NA	molecular_function	0.000445093	0.00265811	LOC100473749	1	0	LOC100473749	1	0
GO:0060037	pharyngeal system development	NA	NA	biological_process	0.00103823	0.00610362	NKX2-5	1	0	NKX2-5	1	0
GO:0048709	oligodendrocyte differentiation	NA	NA	biological_process	0.00163884	0.00952199	SOX9	0	1	CDK5	0	1
GO:0006869	lipid transport	NA	NA	biological_process	0.016803	0.00142129	APOC4	0	1	APOC4;PCTP;LOC100476613	0	3
GO:0010890	positive regulation of sequestering of triglyceride	Cataract	0	biological_process	0.000239694	0.0014428	APOC4	0	1	APOC4	0	1
GO:1903779	regulation of cardiac conduction	Cataract	ATP2B1	biological_process	1.61479e-05	9.87507e-05	NKX2-5	1	0	NKX2-5	1	0
GO:0097638	L-arginine import across plasma membrane	NA	NA	biological_process	0.000334694	0.0020067	LOC100473749	1	0	LOC100473749	1	0
GO:0072358	cardiovascular system development	NA	NA	biological_process	0.000711596	0.00421635	NKX2-5	1	0	NKX2-5	1	0
GO:0007017	microtubule-based process	Cataract, Autosomal Dominant;Cataract	CRYAA	biological_process	0.00570327	0.0315075	LOC100473181	1	0	TUBD1	1	0
GO:0060413	atrial septum morphogenesis	NA	NA	biological_process	0.000445093	0.00265811	NKX2-5	1	0	NKX2-5	1	0
GO:0046330	positive regulation of JNK cascade	Cataract	0	biological_process	0.0083334	0.0449901	CCL19	0	1	EDA2R	0	1
GO:0000186	activation of MAPKK activity	NA	NA	biological_process	0.0474845	0.0107287	LOC100481822	0	1	WDR83;PSMD10;LRRK2	1	2
GO:0001104	RNA polymerase II transcription cofactor activity	NA	NA	molecular_function	0.00610982	0.000185963	NKX2-5	1	0	PPRC1;MED17;NKX2-5	3	0
GO:0051258	protein polymerization	NA	NA	biological_process	0.00610982	0.0336238	LOC100473181	1	0	TUBD1	1	0
GO:0010736	serum response element binding	NA	NA	molecular_function	1.61479e-05	9.87507e-05	NKX2-5	1	0	NKX2-5	1	0
GO:0090575	RNA polymerase II transcription factor complex	NA	NA	cellular_component	0.000867457	0.00511971	NKX2-5	1	0	NKX2-5	1	0
GO:0045823	positive regulation of heart contraction	NA	NA	biological_process	0.000239694	0.0014428	NKX2-5	1	0	NKX2-5	1	0
GO:0060347	heart trabecula formation	NA	NA	biological_process	0.000570767	0.00339525	NKX2-5	1	0	NKX2-5	1	0
GO:0002053	positive regulation of mesenchymal cell proliferation	NA	NA	biological_process	4.95239e-05	NA	SOX9;HMGB1	0	2	NA	0	0
GO:0043280	positive regulation of cysteine-type endopeptidase activity involved in apoptotic process	NA	NA	biological_process	0.0023694	NA	FOXL2	0	1	NA	0	0
GO:0072190	ureter urothelium development	NA	NA	biological_process	1.61479e-05	NA	SOX9	0	1	NA	0	0
GO:0030850	prostate gland development	NA	NA	biological_process	0.000160215	NA	SOX9	0	1	NA	0	0
GO:0003203	endocardial cushion morphogenesis	NA	NA	biological_process	0.000160215	NA	SOX9	0	1	NA	0	0
GO:0004888	transmembrane signaling receptor activity	NA	NA	molecular_function	0.0253502	NA	IGSF6	1	0	NA	0	0
GO:0031463	Cul3-RING ubiquitin ligase complex	NA	NA	cellular_component	0.0238242	0.117072	LOC100481822	0	1	KLHL12	1	0
GO:0001594	trace-amine receptor activity	NA	NA	molecular_function	0.000711596	NA	TAAR9	0	1	NA	0	0
GO:0061046	regulation of branching involved in lung morphogenesis	NA	NA	biological_process	0	NA	SOX9	0	1	NA	0	0
GO:0030246	carbohydrate binding	NA	NA	molecular_function	0.000773025	NA	EMC7;LOC105240235;APCS	3	0	NA	0	0
GO:2000107	negative regulation of leukocyte apoptotic process	NA	NA	biological_process	4.83169e-05	NA	CCL19	0	1	NA	0	0
GO:0008284	positive regulation of cell proliferation	NEURODEVELOPMENTAL DISORDER WITH EPILEPSY, CATARACTS, FEEDING DIFFICULTIES, AND DELAYED BRAIN MYELINATION;CATARACT 13 WITH ADULT i PHENOTYPE;Cataract, zonular;Cataract	NACC1;HSF4;ALDH3A1;GCNT2	biological_process	0.0140663	0.402953	SOX9;HMGB1;NKX2-5	1	2	NKX2-5;KIF20B	2	0
GO:0030857	negative regulation of epithelial cell differentiation	PARTIAL LIPODYSTROPHY, CONGENITAL CATARACTS, AND NEURODEGENERATION SYNDROME	CAV1	biological_process	0.000160215	NA	SOX9	0	1	NA	0	0
GO:0000405	bubble DNA binding	NA	NA	molecular_function	0	NA	HMGB1	0	1	NA	0	0
GO:0014068	positive regulation of phosphatidylinositol 3-kinase signaling	Cataract	0	biological_process	0.000105939	NA	HCST;SOX9	0	2	NA	0	0
GO:0048873	homeostasis of number of cells within a tissue	NA	NA	biological_process	0.00292708	NA	SOX9	0	1	NA	0	0
GO:0007623	circadian rhythm	NA	NA	biological_process	0.0142925	0.0740061	HMGB1	0	1	NONO	0	1
GO:0001771	immunological synapse formation	NA	NA	biological_process	0.000445093	NA	CCL19	0	1	NA	0	0
GO:0045111	intermediate filament cytoskeleton	NA	NA	cellular_component	0.0149036	0.0768798	SMNDC1	1	0	PSMD10	0	1
GO:0006954	inflammatory response	Cataract;CATARACT 6, MULTIPLE TYPES	EPHA2;0	biological_process	0.00159704	0.158093	CCL19;LOC100476107;LOC100480217;HMGB1	0	4	LOC100476759;LOC100476107;LOC100480217	1	2
GO:0043065	positive regulation of apoptotic process	Cataract	ATM	biological_process	0.0257874	NA	FOXL2;HMGB1	0	2	NA	0	0
GO:0003697	single-stranded DNA binding	NA	NA	molecular_function	0.00981639	NA	HMGB1	0	1	NA	0	0
GO:0005125	cytokine activity	NA	NA	molecular_function	0.0119615	0.0628799	HMGB1	0	1	SCGB3A1	1	0
GO:0030154	cell differentiation	CATARACT 43;CATARACT 36;Cataract;Cataract, congenital, with microcornea or slight microphthalmia	TDRD7;NHS;NDRG2;UNC45B	biological_process	0.000966605	0.193073	SOX9;FOXL2;LOC105234993;LOC105234994;LOC100470566;NKX2-5	3	3	TUBD1;SRPK3;LOC105234994;ECSCR;NKX2-5	4	1
GO:0045595	regulation of cell differentiation	NA	NA	biological_process	0.00211163	NA	SOX9	0	1	NA	0	0
GO:0000976	transcription regulatory region sequence-specific DNA binding	NA	NA	molecular_function	0.00570327	NA	SOX9	0	1	NA	0	0
GO:0010634	positive regulation of epithelial cell migration	NA	NA	biological_process	0.00264125	NA	SOX9	0	1	NA	0	0
GO:0001934	positive regulation of protein phosphorylation	Cataract, Autosomal Dominant;Cataract	CRYAA	biological_process	0.0335494	0.15775	SOX9	0	1	LRRK2	1	0
GO:0009749	response to glucose	NA	NA	biological_process	0.000605351	NA	LPL;HMGB1	1	1	NA	0	0
GO:0007507	heart development	Cataract and cardiomyopathy;Cataract;Myopathy, Mitochondrial Progressive, With Congenital Cataract, Hearing Loss, And Developmental Delay;PARTIAL LIPODYSTROPHY, CONGENITAL CATARACTS, AND NEURODEGENERATION SYNDROME	CAV1;ATM;GFER;SOD2	biological_process	0.00692763	0.0710801	SOX9;NKX2-5	1	1	PDLIM3;NKX2-5	2	0
GO:0031018	endocrine pancreas development	NA	NA	biological_process	0.0023694	NA	SOX9	0	1	NA	0	0
GO:0009408	response to heat	Cataract	0	biological_process	0.00386728	NA	HMGB1	0	1	NA	0	0
GO:0010458	exit from mitosis	Congenital Cataracts, Facial Dysmorphism, And Neuropathy;Cataract, posterior polar, 3	CTDP1;CHMP4B	biological_process	0.000334694	NA	UBE2C	0	1	NA	0	0
GO:0002063	chondrocyte development	NA	NA	biological_process	0.00142404	NA	SOX9	0	1	NA	0	0
GO:0003413	chondrocyte differentiation involved in endochondral bone morphogenesis	NA	NA	biological_process	0	NA	SOX9	0	1	NA	0	0
GO:0044869	negative regulation by host of viral exo-alpha-sialidase activity	NA	NA	biological_process	1.61479e-05	NA	APCS	1	0	NA	0	0
GO:0071013	catalytic step 2 spliceosome	NA	NA	cellular_component	0.0407509	0.186133	FRG1	0	1	WDR83	0	1
GO:0035019	somatic stem cell population maintenance	NA	NA	biological_process	0.00740623	NA	SOX9	0	1	NA	0	0
GO:0003690	double-stranded DNA binding	Cataracts, Congenital, with Sensorineural Deafness, Down Syndrome-Like Facial Appearance, Short Stature, and Mental Retardation;Cataract, Pulverulent, Juvenile-Onset	MAF	molecular_function	0.0181236	NA	HMGB1	0	1	NA	0	0
GO:2000147	positive regulation of cell motility	NA	NA	biological_process	0.000239694	NA	CCL19	0	1	NA	0	0
GO:0010628	positive regulation of gene expression	Cataracts, Congenital, with Sensorineural Deafness, Down Syndrome-Like Facial Appearance, Short Stature, and Mental Retardation;Cataract, Nuclear Diffuse Nonprogressive;Cataract, Pulverulent, Juvenile-Onset;Cataract;PARTIAL LIPODYSTROPHY, CONGENITAL CATARACTS, AND NEURODEGENERATION SYNDROME	CAV1;ATM;VIM;MAF	biological_process	0.0121535	0.113861	SOX9;NKX2-5	1	1	RGCC;NKX2-5	2	0
GO:0060729	intestinal epithelial structure maintenance	NA	NA	biological_process	1.61479e-05	NA	SOX9	0	1	NA	0	0
GO:0000401	open form four-way junction DNA binding	NA	NA	molecular_function	0	NA	HMGB1	0	1	NA	0	0
GO:0022625	cytosolic large ribosomal subunit	NA	NA	cellular_component	0.00347708	NA	RPL8;LOC100481032	1	1	NA	0	0
GO:0016021	integral component of membrane	Cataract, Zonular Pulverulent 1;CATARACT 13 WITH ADULT i PHENOTYPE;CATARACT 41;Cryohydrocytosis, Stomatin-Deficient, with Mental Retardation, Seizures, Cataracts, and Massive Hepatosplenomegaly;Cataract microcornea syndrome;CATARACT 15, MULTIPLE TYPES;CONGENITAL CATARACTS, HEARING LOSS, AND NEURODEGENERATION;Cataract, Juvenile, With Microcornea And Glucosuria;Cataract, Zonular Pulverulent 3;HEMOR…	CAV1;EPHA2;ALDH3A1;SLC4A4;ABHD12;SLC33A1;ATP2B1;MIP;SLC16A12;SLC2A1;RDH11;GJA3;WFS1;MSMO1;JAM3;GCNT2;LEMD2;LIM2;GJA8	cellular_component	0.00977941	0.909683	HCST;MFSD6L;TAAR9;SLITRK4;CLDN17;LOC100480363;EMC7;EMC4;LOC105240235;LOC100481225;ITM2A;STX19;LOC100481636;LOC105234522;LOC100476684;LOC100469549;LOC100470057;LOC109488659;LOC105235318;SUCNR1;MMGT1	13	8	LOC100478332;LOC100473797;ACVR2A;LOC109490274;TMEM100;SLC25A20;LOC109488353;MSMO1;MS4A5;EDA2R;LOC100480531;AQP11;ADAM2;LOC105242099;HEPHL1;LOC109488338;LOC109488659;EBAG9;LOC100484478;ECSCR;OPALIN;OSTM1;SYP;TMEM158;SRD5A3;LMBRD1	16	10
GO:0019843	rRNA binding	NA	NA	molecular_function	0.0103349	0.0549512	RPL8	0	1	MRPL20	0	1
GO:0014032	neural crest cell development	Cataract	0	biological_process	0.000334694	NA	SOX9	0	1	NA	0	0
GO:0042703	menstruation	NA	NA	biological_process	0	NA	FOXL2	0	1	NA	0	0
GO:0005549	odorant binding	NA	NA	molecular_function	0.0142925	0.0740061	LOC100476684	1	0	LOC100473797	1	0
GO:0030903	notochord development	Cataract	COL2A1	biological_process	0.000160215	NA	SOX9	0	1	NA	0	0
GO:0031732	CCR7 chemokine receptor binding	NA	NA	molecular_function	0	NA	CCL19	0	1	NA	0	0
GO:0072289	metanephric nephron tubule formation	NA	NA	biological_process	4.83169e-05	NA	SOX9	0	1	NA	0	0
GO:0006511	ubiquitin-dependent protein catabolic process	NA	NA	biological_process	0.0379866	0.175398	UBE2C	0	1	LOC100466049	1	0
GO:0045069	regulation of viral genome replication	NA	NA	biological_process	9.63811e-05	NA	LOC100467691	1	0	NA	0	0
GO:0002683	negative regulation of immune system process	NA	NA	biological_process	0	NA	SOX9	0	1	NA	0	0
GO:0044871	negative regulation by host of viral glycoprotein metabolic process	NA	NA	biological_process	1.61479e-05	NA	APCS	1	0	NA	0	0
GO:0033034	positive regulation of myeloid cell apoptotic process	NA	NA	biological_process	0	NA	HMGB1	0	1	NA	0	0
GO:0050786	RAGE receptor binding	NA	NA	molecular_function	1.61479e-05	NA	HMGB1	0	1	NA	0	0
GO:0042277	peptide binding	NA	NA	molecular_function	0.000521982	0.0575524	LOC100467691;HMGB1	1	1	TMEM158	0	1
GO:0070830	bicellular tight junction assembly	CATARACT 6, MULTIPLE TYPES	EPHA2	biological_process	0.00652924	NA	CLDN17	1	0	NA	0	0
GO:0051897	positive regulation of protein kinase B signaling	CATARACT 13 WITH ADULT i PHENOTYPE;Cataract	0;GCNT2	biological_process	0.0174579	NA	CCL19	0	1	NA	0	0
GO:0032808	lacrimal gland development	NA	NA	biological_process	4.83169e-05	NA	SOX9	0	1	NA	0	0
GO:0005200	structural constituent of cytoskeleton	Cataract, Nuclear Diffuse Nonprogressive;Cataract, Cortical, Juvenile-Onset;Cataract, Autosomal Dominant, Multiple Types 1;Cataract	BFSP2;BFSP1;VIM	molecular_function	0.0285181	0.13707	LOC100473181	1	0	TUBD1	1	0
GO:0060009	Sertoli cell development	Cataract	0	biological_process	0.000334694	NA	SOX9	0	1	NA	0	0
GO:0070374	positive regulation of ERK1 and ERK2 cascade	CATARACT 13 WITH ADULT i PHENOTYPE;Cataract	0;GCNT2	biological_process	0.0388997	NA	CCL19	0	1	NA	0	0
GO:0005085	guanyl-nucleotide exchange factor activity	NA	NA	molecular_function	0.0361858	NA	LOC105235189	1	0	NA	0	0
GO:0019100	male germ-line sex determination	NA	NA	biological_process	1.61479e-05	NA	SOX9	0	1	NA	0	0
GO:0002181	cytoplasmic translation	NA	NA	biological_process	0.00322677	NA	RPL8	0	1	NA	0	0
GO:0016607	nuclear speck	Cataract, zonular	HSF4	cellular_component	0.0325539	0.24581	LOC100472465;SMNDC1	1	1	LUC7L3;NONO	1	1
GO:0060350	endochondral bone morphogenesis	NA	NA	biological_process	9.63811e-05	NA	SOX9	0	1	NA	0	0
GO:0031532	actin cytoskeleton reorganization	Cataract	0	biological_process	0.0136927	NA	HMGB1	0	1	NA	0	0
GO:0072189	ureter development	NA	NA	biological_process	1.61479e-05	NA	SOX9	0	1	NA	0	0
GO:0072193	ureter smooth muscle cell differentiation	NA	NA	biological_process	1.61479e-05	NA	SOX9	0	1	NA	0	0
GO:0050930	induction of positive chemotaxis	NA	NA	biological_process	0.000445093	NA	HMGB1	0	1	NA	0	0
GO:0007173	epidermal growth factor receptor signaling pathway	NA	NA	biological_process	0.0144871	0.131365	SOX9;LOC100481822	0	2	WDR83;PSMD10	0	2
GO:0060512	prostate gland morphogenesis	NA	NA	biological_process	0	NA	SOX9	0	1	NA	0	0
GO:0000413	protein peptidyl-prolyl isomerization	NA	NA	biological_process	0.00530969	NA	LOC100467691	1	0	NA	0	0
GO:0072610	interleukin-12 secretion	NA	NA	biological_process	0	NA	CCL19	0	1	NA	0	0
GO:0019933	cAMP-mediated signaling	NA	NA	biological_process	0.00610982	NA	SOX9	0	1	NA	0	0
GO:0045662	negative regulation of myoblast differentiation	NA	NA	biological_process	0.00163884	NA	SOX9	0	1	NA	0	0
GO:0072197	ureter morphogenesis	NA	NA	biological_process	1.61479e-05	NA	SOX9	0	1	NA	0	0
GO:0035622	intrahepatic bile duct development	NA	NA	biological_process	0	NA	SOX9	0	1	NA	0	0
GO:2000138	positive regulation of cell proliferation involved in heart morphogenesis	NA	NA	biological_process	4.83169e-05	NA	SOX9	0	1	NA	0	0
GO:0008009	chemokine activity	NA	NA	molecular_function	0.00211163	NA	CCL19	0	1	NA	0	0
GO:0008156	negative regulation of DNA replication	NA	NA	biological_process	0.000711596	NA	HMGB1	0	1	NA	0	0
GO:0010942	positive regulation of cell death	Cataract	0	biological_process	0.00103823	NA	HMGB1	0	1	NA	0	0
GO:0032868	response to insulin	Cataract;Cryohydrocytosis, Stomatin-Deficient, with Mental Retardation, Seizures, Cataracts, and Massive Hepatosplenomegaly;MUSCULAR DYSTROPHY, CONGENITAL, WITH CATARACTS AND INTELLECTUAL DISABILITY	0;SLC2A1;INPP5K	biological_process	0.00420788	NA	HMGB1	0	1	NA	0	0
GO:0015693	magnesium ion transport	NA	NA	biological_process	0.000570767	NA	MMGT1	0	1	NA	0	0
GO:0000149	SNARE binding	PARTIAL LIPODYSTROPHY, CONGENITAL CATARACTS, AND NEURODEGENERATION SYNDROME	CAV1	molecular_function	0.00981639	0.0523933	STX19	1	0	LRRK2	1	0
GO:0060221	retinal rod cell differentiation	NA	NA	biological_process	1.61479e-05	NA	SOX9	0	1	NA	0	0
GO:0001658	branching involved in ureteric bud morphogenesis	NA	NA	biological_process	0.00652924	NA	SOX9	0	1	NA	0	0
GO:0001502	cartilage condensation	Cataract	COL2A1	biological_process	0.00103823	NA	SOX9	0	1	NA	0	0
GO:0072034	renal vesicle induction	NA	NA	biological_process	4.83169e-05	NA	SOX9	0	1	NA	0	0
GO:0003700	transcription factor activity, sequence-specific DNA binding	Cataracts, Congenital, with Sensorineural Deafness, Down Syndrome-Like Facial Appearance, Short Stature, and Mental Retardation;Cataract, posterior polar, 4;Cataract, zonular;Cataract, Pulverulent, Juvenile-Onset;Cataract;Cataract, Autosomal Recessive Congenital 3	HSF4;PITX3;MAF;FOXE3	molecular_function	0.0431341	0.610799	SOX9;LOC100483632;LOC105234326;FOXL2;NKX2-5	3	2	TLX2;HOXC6;LOC105239870;HOXB7;NKX2-5	1	4
GO:0032757	positive regulation of interleukin-8 production	Cataract	0	biological_process	0.0012238	NA	HMGB1	0	1	NA	0	0
GO:0002407	dendritic cell chemotaxis	NA	NA	biological_process	4.83169e-05	NA	CCL19	0	1	NA	0	0
GO:0034341	response to interferon-gamma	NA	NA	biological_process	0.0012238	NA	HMGB1	0	1	NA	0	0
GO:0090023	positive regulation of neutrophil chemotaxis	Cataract	0	biological_process	0.000867457	NA	CCL19	0	1	NA	0	0
GO:0003681	bent DNA binding	NA	NA	molecular_function	1.61479e-05	NA	HMGB1	0	1	NA	0	0
GO:2000794	regulation of epithelial cell proliferation involved in lung morphogenesis	NA	NA	biological_process	0	NA	SOX9	0	1	NA	0	0
GO:0030279	negative regulation of ossification	NA	NA	biological_process	0.0012238	NA	SOX9	0	1	NA	0	0
GO:0007166	cell surface receptor signaling pathway	NA	NA	biological_process	0.0253664	0.462217	GPR88;IGSF6	2	0	LOC100476759	1	0
GO:0030695	GTPase regulator activity	NA	NA	molecular_function	0.0023694	NA	LOC105235189	1	0	NA	0	0
GO:0008584	male gonad development	Cataract	0	biological_process	0.0114076	0.0601956	SOX9	0	1	ASPM	1	0
GO:0060784	regulation of cell proliferation involved in tissue homeostasis	NA	NA	biological_process	0	NA	SOX9	0	1	NA	0	0
GO:0050921	positive regulation of chemotaxis	NA	NA	biological_process	0.000445093	NA	CCL19	0	1	NA	0	0
GO:0043548	phosphatidylinositol 3-kinase binding	NA	NA	molecular_function	0.000445093	NA	HCST	0	1	NA	0	0
GO:0000902	cell morphogenesis	Cataract	0	biological_process	0.0136927	NA	HMGB1	0	1	NA	0	0
GO:0050790	regulation of catalytic activity	Cataract and cardiomyopathy	SOD2	biological_process	0.0125271	NA	LOC105235189	1	0	NA	0	0
GO:0007417	central nervous system development	Cataract;CONGENITAL CATARACTS, HEARING LOSS, AND NEURODEGENERATION	COL2A1;SLC33A1	biological_process	0.0344194	NA	SOX9	0	1	NA	0	0
GO:0001942	hair follicle development	NA	NA	biological_process	0.00652924	NA	SOX9	0	1	NA	0	0
GO:2001054	negative regulation of mesenchymal cell apoptotic process	NA	NA	biological_process	4.83169e-05	NA	SOX9	0	1	NA	0	0
GO:0015095	magnesium ion transmembrane transporter activity	NA	NA	molecular_function	0.00142404	NA	MMGT1	0	1	NA	0	0
GO:0005680	anaphase-promoting complex	NA	NA	cellular_component	0.00264125	NA	UBE2C	0	1	NA	0	0
GO:0043552	positive regulation of phosphatidylinositol 3-kinase activity	NA	NA	biological_process	0.00322677	NA	CCL19	0	1	NA	0	0
GO:0045656	negative regulation of monocyte differentiation	NA	NA	biological_process	0.000239694	NA	APCS	1	0	NA	0	0
GO:0050885	neuromuscular process controlling balance	NA	NA	biological_process	0.0119615	NA	GPR88	1	0	NA	0	0
GO:0006461	protein complex assembly	NA	NA	biological_process	0.0285181	NA	SOX9	0	1	NA	0	0
GO:0090103	cochlea morphogenesis	NA	NA	biological_process	0.00163884	NA	SOX9	0	1	NA	0	0
GO:0071407	cellular response to organic cyclic compound	NA	NA	biological_process	0.00652924	NA	P2RY13	1	0	NA	0	0
GO:0045165	cell fate commitment	NA	NA	biological_process	0.0093099	NA	SOX9	0	1	NA	0	0
GO:0060517	epithelial cell proliferation involved in prostatic bud elongation	NA	NA	biological_process	0	NA	SOX9	0	1	NA	0	0
GO:0061138	morphogenesis of a branching epithelium	NA	NA	biological_process	1.61479e-05	NA	SOX9	0	1	NA	0	0
GO:0006887	exocytosis	NA	NA	biological_process	0.0398211	0.182544	STX19	1	0	LOC100480531	0	1
GO:0045666	positive regulation of neuron differentiation	Cataract	0	biological_process	0.0201841	0.101045	NKX2-5	1	0	NKX2-5	1	0
GO:0071560	cellular response to transforming growth factor beta stimulus	PARTIAL LIPODYSTROPHY, CONGENITAL CATARACTS, AND NEURODEGENERATION SYNDROME	CAV1	biological_process	0.00456188	NA	SOX9	0	1	NA	0	0
GO:0005623	cell	Cataract, Nuclear Diffuse Nonprogressive;Cataract	VIM	cellular_component	0.0181236	NA	CCL19	0	1	NA	0	0
GO:0072546	ER membrane protein complex	NA	NA	cellular_component	5.04968e-08	NA	EMC7;EMC4;MMGT1	2	1	NA	0	0
GO:0071504	cellular response to heparin	NA	NA	biological_process	1.61479e-05	NA	SOX9	0	1	NA	0	0
GO:0001708	cell fate specification	NA	NA	biological_process	0.00163884	NA	SOX9	0	1	NA	0	0
GO:0008097	5S rRNA binding	NA	NA	molecular_function	9.63811e-05	NA	HMGB1	0	1	NA	0	0
GO:0044212	transcription regulatory region DNA binding	NA	NA	molecular_function	0.0163928	0.145073	SOX9;NKX2-5	1	1	SOX17;NKX2-5	1	1
GO:0001894	tissue homeostasis	Cataract	COL2A1;AKR1B1	biological_process	0.000570767	NA	SOX9	0	1	NA	0	0
GO:0048260	positive regulation of receptor-mediated endocytosis	NA	NA	biological_process	0.000570767	NA	CCL19	0	1	NA	0	0
GO:0071347	cellular response to interleukin-1	NA	NA	biological_process	0.00028908	NA	SOX9;HMGB1	0	2	NA	0	0
GO:0097100	supercoiled DNA binding	NA	NA	molecular_function	4.83169e-05	NA	HMGB1	0	1	NA	0	0
GO:0003415	chondrocyte hypertrophy	NA	NA	biological_process	1.61479e-05	NA	SOX9	0	1	NA	0	0
GO:0016338	calcium-independent cell-cell adhesion via plasma membrane cell-adhesion molecules	NA	NA	biological_process	0.00142404	NA	CLDN17	1	0	NA	0	0
GO:0032735	positive regulation of interleukin-12 production	Cataract	0	biological_process	0.000867457	NA	CCL19	0	1	NA	0	0
GO:0003170	heart valve development	NA	NA	biological_process	1.61479e-05	NA	SOX9	0	1	NA	0	0
GO:0032331	negative regulation of chondrocyte differentiation	NA	NA	biological_process	0.00103823	NA	SOX9	0	1	NA	0	0
GO:0050679	positive regulation of epithelial cell proliferation	Cataract, Autosomal Recessive Congenital 3	FOXE3	biological_process	0.00696141	NA	SOX9	0	1	NA	0	0
GO:0003179	heart valve morphogenesis	NA	NA	biological_process	1.61479e-05	NA	SOX9	0	1	NA	0	0
GO:0030858	positive regulation of epithelial cell differentiation	Cataract	0	biological_process	9.63811e-05	NA	SOX9	0	1	NA	0	0
GO:0008021	synaptic vesicle	NA	NA	cellular_component	0.0293337	NA	STX19	1	0	NA	0	0
GO:0097029	mature conventional dendritic cell differentiation	NA	NA	biological_process	0	NA	CCL19	0	1	NA	0	0
GO:0045931	positive regulation of mitotic cell cycle	Cataract	0	biological_process	0.00211163	NA	HMGB1	0	1	NA	0	0
GO:0097157	pre-mRNA intronic binding	NA	NA	molecular_function	0.000239694	NA	SOX9	0	1	NA	0	0
GO:0030916	otic vesicle formation	NA	NA	biological_process	0.000160215	NA	SOX9	0	1	NA	0	0
GO:0015030	Cajal body	NA	NA	cellular_component	0.000605351	NA	FRG1;SMNDC1	1	1	NA	0	0
GO:0070979	protein K11-linked ubiquitination	NA	NA	biological_process	0.00420788	NA	UBE2C	0	1	NA	0	0
GO:0030502	negative regulation of bone mineralization	NA	NA	biological_process	0.000239694	NA	SOX9	0	1	NA	0	0
GO:0032496	response to lipopolysaccharide	Cataract and cardiomyopathy;Cataract;Myopathy, Mitochondrial Progressive, With Congenital Cataract, Hearing Loss, And Developmental Delay	0;GFER;SOD2	biological_process	0.0261278	NA	HMGB1	0	1	NA	0	0
GO:0000307	cyclin-dependent protein kinase holoenzyme complex	NA	NA	cellular_component	0.000711596	NA	LOC100472465	0	1	NA	0	0
GO:0014911	positive regulation of smooth muscle cell migration	Cataract	0	biological_process	0.00163884	NA	HMGB1	0	1	NA	0	0
GO:0051861	glycolipid binding	NA	NA	molecular_function	0.000239694	NA	HMGB1	0	1	NA	0	0
GO:0006955	immune response	Cataract	0	biological_process	0.0349964	0.259173	IGSF6;CCL19	1	1	LOC100476759;LOC100463889	2	0
GO:0034695	response to prostaglandin E	NA	NA	biological_process	1.61479e-05	NA	CCL19	0	1	NA	0	0
GO:0045216	cell-cell junction organization	NA	NA	biological_process	0.0125271	NA	CLDN17	1	0	NA	0	0
GO:0016337	single organismal cell-cell adhesion	NA	NA	biological_process	0.0398211	NA	SOX9	0	1	NA	0	0
GO:0003188	heart valve formation	NA	NA	biological_process	0	NA	SOX9	0	1	NA	0	0
GO:0035589	G-protein coupled purinergic nucleotide receptor signaling pathway	NA	NA	biological_process	0.000239694	NA	P2RY13	1	0	NA	0	0
GO:0070168	negative regulation of biomineral tissue development	Cataract	0	biological_process	1.61479e-05	NA	SOX9	0	1	NA	0	0
GO:0007608	sensory perception of smell	NA	NA	biological_process	0.0118783	0.11174	LOC100480363;LOC100476684	2	0	LOC100473797;GFY	1	1
GO:0030133	transport vesicle	NA	NA	cellular_component	0.0181236	0.091752	PLEKHF2	1	0	CPA3	0	1
GO:0005615	extracellular space	HEMORRHAGIC DESTRUCTION OF THE BRAIN, SUBEPENDYMAL CALCIFICATION, AND CATARACTS;Cataract;Myopathy, Mitochondrial Progressive, With Congenital Cataract, Hearing Loss, And Developmental Delay;CATARACT 15, MULTIPLE TYPES	MIP;COL2A1;JAM3;AKR1B1;GFER	cellular_component	0.0379507	0.376522	SERPINA7;LOC105234522;CCL19;LOC100476689;HMGB1;CSN3	2	4	LOC109489895;SPOCK3;C1QTNF4;LRRK2;SERPINB11;CPA3;SCGB3A1;LOC100484313	6	2
GO:0071260	cellular response to mechanical stimulus	Cataract;Cryohydrocytosis, Stomatin-Deficient, with Mental Retardation, Seizures, Cataracts, and Massive Hepatosplenomegaly;PARTIAL LIPODYSTROPHY, CONGENITAL CATARACTS, AND NEURODEGENERATION SYNDROME	CAV1;COL2A1;SLC2A1	biological_process	0.00740623	NA	SOX9	0	1	NA	0	0
GO:0030018	Z disc	CATARACT 43;CATARACT 16, MULTIPLE TYPES;Cataract;Cryohydrocytosis, Stomatin-Deficient, with Mental Retardation, Seizures, Cataracts, and Massive Hepatosplenomegaly	CRYAB;SLC2A1;UNC45B	cellular_component	0.0494785	0.218824	FRG1	0	1	PDLIM3	1	0
GO:0005694	chromosome	NA	NA	cellular_component	0.0326882	NA	HMGB1	0	1	NA	0	0
GO:0007257	activation of JUN kinase activity	Cataract	ERCC6	biological_process	0.00492919	NA	CCL19	0	1	NA	0	0
GO:0010560	positive regulation of glycoprotein biosynthetic process	NA	NA	biological_process	0	NA	CCL19	0	1	NA	0	0
GO:0000402	crossed form four-way junction DNA binding	NA	NA	molecular_function	0	NA	HMGB1	0	1	NA	0	0
GO:0060041	retina development in camera-type eye	NA	NA	biological_process	0.0119615	NA	SOX9	0	1	NA	0	0
GO:0010629	negative regulation of gene expression	Cataract, Autosomal Dominant;CATARACT 16, MULTIPLE TYPES;Cataract;RETINAL DYSTROPHY AND IRIS COLOBOMA WITH OR WITHOUT CONGENITAL CATARACT	CRYAA;CRYAB;MIR204	biological_process	0.046499	NA	SOX9	0	1	NA	0	0
GO:0030097	hemopoiesis	Cataract and cardiomyopathy	SOD2	biological_process	0.0125271	0.0656041	NKX2-5	1	0	NKX2-5	1	0
GO:0050727	regulation of inflammatory response	Cataract	0	biological_process	0.00610982	NA	HMGB1	0	1	NA	0	0
GO:0046790	virion binding	NA	NA	molecular_function	9.63811e-05	NA	APCS	1	0	NA	0	0
GO:0030335	positive regulation of cell migration	Cataract and cardiomyopathy;CATARACT 13 WITH ADULT i PHENOTYPE;Cataract;PARTIAL LIPODYSTROPHY, CONGENITAL CATARACTS, AND NEURODEGENERATION SYNDROME	CAV1;ATM;GCNT2;SOD2	biological_process	0.0494785	NA	HMGB1	0	1	NA	0	0
GO:0016538	cyclin-dependent protein serine/threonine kinase regulator activity	NA	NA	molecular_function	0.000711596	NA	LOC100472465	0	1	NA	0	0
GO:0002606	positive regulation of dendritic cell antigen processing and presentation	NA	NA	biological_process	4.83169e-05	NA	CCL19	0	1	NA	0	0
GO:0060491	regulation of cell projection assembly	NA	NA	biological_process	1.61479e-05	NA	CCL19	0	1	NA	0	0
GO:0032760	positive regulation of tumor necrosis factor production	Cataract	0	biological_process	0.00013679	NA	CCL19;HMGB1	0	2	NA	0	0
GO:0035326	enhancer binding	NA	NA	molecular_function	0.000445093	NA	SOX9	0	1	NA	0	0
GO:0004465	lipoprotein lipase activity	NA	NA	molecular_function	9.63811e-05	NA	LPL	1	0	NA	0	0
GO:0031629	synaptic vesicle fusion to presynaptic membrane	NA	NA	biological_process	0.000570767	NA	STX19	1	0	NA	0	0
GO:0006334	nucleosome assembly	NA	NA	biological_process	0.000354045	0.200585	SOX9;LOC105234993;LOC105234994	2	1	LOC105234994	1	0
GO:0031201	SNARE complex	NA	NA	cellular_component	0.0119615	0.0628799	STX19	1	0	LOC100480531	0	1
GO:0046597	negative regulation of viral entry into host cell	NA	NA	biological_process	0.000570767	NA	APCS	1	0	NA	0	0
GO:0045893	positive regulation of transcription, DNA-templated	Cataract, posterior polar, 4;Cataract;MUSCULAR DYSTROPHY, CONGENITAL, WITH CATARACTS AND INTELLECTUAL DISABILITY	PITX3;INPP5K	biological_process	0.0480183	0.248256	SOX9;FOXL2;NKX2-5	1	2	TFB2M;LOC105239870;SOX17;NKX2-5	2	2
GO:0060008	Sertoli cell differentiation	NA	NA	biological_process	0.000160215	NA	SOX9	0	1	NA	0	0
GO:0031012	extracellular matrix	Cataract	COL2A1	cellular_component	0.0301586	0.143895	APCS	1	0	SPOCK3	1	0
GO:0071364	cellular response to epidermal growth factor stimulus	MUSCULAR DYSTROPHY, CONGENITAL, WITH CATARACTS AND INTELLECTUAL DISABILITY	INPP5K	biological_process	0.00142404	NA	SOX9	0	1	NA	0	0
GO:0005903	brush border	NA	NA	cellular_component	0.0142925	NA	LOC105235189	1	0	NA	0	0
GO:0030879	mammary gland development	PARTIAL LIPODYSTROPHY, CONGENITAL CATARACTS, AND NEURODEGENERATION SYNDROME	CAV1	biological_process	0.00103823	NA	SOX9	0	1	NA	0	0
GO:2000741	positive regulation of mesenchymal stem cell differentiation	NA	NA	biological_process	9.63811e-05	NA	SOX9	0	1	NA	0	0
GO:0060532	bronchus cartilage development	NA	NA	biological_process	1.61479e-05	NA	SOX9	0	1	NA	0	0
GO:0090190	positive regulation of branching involved in ureteric bud morphogenesis	NA	NA	biological_process	0.00142404	NA	SOX9	0	1	NA	0	0
GO:0030155	regulation of cell adhesion	NA	NA	biological_process	0.00696141	NA	SOX9	0	1	NA	0	0
GO:0072562	blood microparticle	NA	NA	cellular_component	0.0187999	NA	APCS	1	0	NA	0	0
GO:0060174	limb bud formation	Cataract	COL2A1	biological_process	0.000445093	NA	SOX9	0	1	NA	0	0
GO:0043028	cysteine-type endopeptidase regulator activity involved in apoptotic process	NA	NA	molecular_function	0	NA	FOXL2	0	1	NA	0	0
GO:0072170	metanephric tubule development	NA	NA	biological_process	0	NA	SOX9	0	1	NA	0	0
GO:0002062	chondrocyte differentiation	Cataract	COL2A1	biological_process	0.00420788	NA	SOX9	0	1	NA	0	0
GO:0000400	four-way junction DNA binding	NA	NA	molecular_function	0.000445093	NA	HMGB1	0	1	NA	0	0
GO:0005681	spliceosomal complex	NA	NA	cellular_component	0.0484777	0.215164	SMNDC1	1	0	WDR83	0	1
GO:0005664	nuclear origin of replication recognition complex	NA	NA	cellular_component	0.000239694	NA	ORC6	1	0	NA	0	0
GO:0001501	skeletal system development	Cataract;CATARACT 6, MULTIPLE TYPES	EPHA2;COL2A1	biological_process	0.0398211	NA	SOX9	0	1	NA	0	0
GO:0034329	cell junction assembly	NA	NA	biological_process	0.0136927	NA	CLDN17	1	0	NA	0	0
GO:0001158	enhancer sequence-specific DNA binding	NA	NA	molecular_function	0.00163884	NA	SOX9	0	1	NA	0	0
GO:1902043	positive regulation of extrinsic apoptotic signaling pathway via death domain receptors	NA	NA	biological_process	0.00103823	NA	ZSWIM2	1	0	NA	0	0
GO:0032755	positive regulation of interleukin-6 production	Cataract	0	biological_process	0.00354021	NA	HMGB1	0	1	NA	0	0
GO:0003755	peptidyl-prolyl cis-trans isomerase activity	NA	NA	molecular_function	0.00981639	NA	LOC100467691	1	0	NA	0	0
GO:0030238	male sex determination	NA	NA	biological_process	0.000570767	NA	SOX9	0	1	NA	0	0
GO:0031225	anchored component of membrane	NA	NA	cellular_component	0.0494785	NA	LPL	1	0	NA	0	0
GO:0042346	positive regulation of NF-kappaB import into nucleus	NA	NA	biological_process	0.0012238	NA	CCL19	0	1	NA	0	0
GO:0043123	positive regulation of I-kappaB kinase/NF-kappaB signaling	Cataract	0	biological_process	0.000502616	0.0626024	CCL19;LOC100476107;LOC100480217	0	3	LOC100476107;LOC100480217	0	2
GO:0071642	positive regulation of macrophage inflammatory protein 1 alpha production	NA	NA	biological_process	0	NA	HMGB1	0	1	NA	0	0
GO:0060534	trachea cartilage development	NA	NA	biological_process	4.83169e-05	NA	SOX9	0	1	NA	0	0
GO:0003735	structural constituent of ribosome	Cataract	ATM	molecular_function	0.0439904	0.3052	RPL8;LOC100481032	1	1	RPS7;MRPL20	1	1
GO:0032732	positive regulation of interleukin-1 production	Cataract	0	biological_process	0	NA	HMGB1	0	1	NA	0	0
GO:0045663	positive regulation of myoblast differentiation	NA	NA	biological_process	0.00292708	NA	HMGB1	0	1	NA	0	0
GO:0050831	male-specific defense response to bacterium	NA	NA	biological_process	0	NA	HMGB1	0	1	NA	0	0
GO:0006935	chemotaxis	Cataract	0	biological_process	0.0293337	0.140474	HMGB1	0	1	ECSCR	1	0
GO:0050776	regulation of immune response	Cataract	COL2A1	biological_process	0.00740623	NA	HCST	0	1	NA	0	0
GO:2000549	positive regulation of dendritic cell dendrite assembly	NA	NA	biological_process	0	NA	CCL19	0	1	NA	0	0
GO:0071731	response to nitric oxide	NA	NA	biological_process	0	NA	CCL19	0	1	NA	0	0
GO:1901409	positive regulation of phosphorylation of RNA polymerase II C-terminal domain	NA	NA	biological_process	0.000239694	NA	LOC100472465	0	1	NA	0	0
GO:0050718	positive regulation of interleukin-1 beta secretion	Cataract	0	biological_process	0.000711596	NA	CCL19	0	1	NA	0	0
GO:2000020	positive regulation of male gonad development	Cataract	0	biological_process	9.63811e-05	NA	SOX9	0	1	NA	0	0
GO:0046982	protein heterodimerization activity	Cataracts, Congenital, with Sensorineural Deafness, Down Syndrome-Like Facial Appearance, Short Stature, and Mental Retardation;Cataract, Pulverulent, Juvenile-Onset;HEMORRHAGIC DESTRUCTION OF THE BRAIN, SUBEPENDYMAL CALCIFICATION, AND CATARACTS;PARTIAL LIPODYSTROPHY, CONGENITAL CATARACTS, AND NEURODEGENERATION SYNDROME	CAV1;JAM3;MAF	molecular_function	0.0151074	0.135882	SOX9;NKX2-5	1	1	NKX2-5;TXLNG	2	0
GO:0032332	positive regulation of chondrocyte differentiation	Cataract	0	biological_process	0.000711596	NA	SOX9	0	1	NA	0	0
GO:0042627	chylomicron	NA	NA	cellular_component	0.000570767	NA	LPL	1	0	NA	0	0
GO:0048278	vesicle docking	NA	NA	biological_process	0.0012238	NA	STX19	1	0	NA	0	0
GO:0007186	G-protein coupled receptor signaling pathway	Cataract;MUSCULAR DYSTROPHY, CONGENITAL, WITH CATARACTS AND INTELLECTUAL DISABILITY;CATARACT 15, MULTIPLE TYPES	MIP;INPP5K	biological_process	0.00135066	0.352837	GPR88;TAAR9;LOC100480363;LOC100476684;P2RY13	4	1	LOC100478332;LOC100473797;GNAI1	2	1
GO:0016363	nuclear matrix	Cataract, Nuclear Diffuse Nonprogressive;Cataract	VIM	cellular_component	0.0301586	NA	LOC100470566	0	1	NA	0	0
GO:0002408	myeloid dendritic cell chemotaxis	NA	NA	biological_process	1.61479e-05	NA	CCL19	0	1	NA	0	0
GO:0034236	protein kinase A catalytic subunit binding	NA	NA	molecular_function	0.000239694	NA	SOX9	0	1	NA	0	0
GO:0051216	cartilage development	Cataract	COL2A1	biological_process	0.0093099	NA	SOX9	0	1	NA	0	0
GO:0032392	DNA geometric change	NA	NA	biological_process	0.000160215	NA	HMGB1	0	1	NA	0	0
GO:0001837	epithelial to mesenchymal transition	Cataract	0	biological_process	0.00163884	NA	SOX9	0	1	NA	0	0
GO:0006915	apoptotic process	Cataract, Autosomal Dominant;Cataract;CATARACT 6, MULTIPLE TYPES	CRYAA;ATM;EPHA2	biological_process	0.0181957	0.0835521	EMC4;ZSWIM2;SMNDC1;MAGEH1	3	1	PSMD10;EGLN3;CASP3;EBAG9;CDK5;ECSCR	4	2
GO:0048469	cell maturation	Cataract, Cortical, Juvenile-Onset;Cataract, Autosomal Dominant, Multiple Types 1;Cataract	BFSP2;BFSP1;0	biological_process	0.00420788	NA	CCL19	0	1	NA	0	0
GO:0007517	muscle organ development	CATARACT 43;CATARACT 16, MULTIPLE TYPES;Cataract	CRYAB;UNC45B	biological_process	0.0194868	NA	FRG1	0	1	NA	0	0
GO:0070371	ERK1 and ERK2 cascade	NA	NA	biological_process	0.000570767	NA	SOX9	0	1	NA	0	0
GO:0060487	lung epithelial cell differentiation	NA	NA	biological_process	0.000239694	NA	SOX9	0	1	NA	0	0
GO:0060441	epithelial tube branching involved in lung morphogenesis	NA	NA	biological_process	0.000445093	NA	SOX9	0	1	NA	0	0
GO:0051450	myoblast proliferation	NA	NA	biological_process	1.61479e-05	NA	HMGB1	0	1	NA	0	0
GO:0045627	positive regulation of T-helper 1 cell differentiation	NA	NA	biological_process	0.000239694	NA	CCL19	0	1	NA	0	0
GO:0007626	locomotory behavior	Cataract, posterior polar, 4;Cataract and cardiomyopathy;Cataract;Optic atrophy and cataract, autosomal dominant	PITX3;OPA3;SOD2	biological_process	0.0238242	NA	GPR88	1	0	NA	0	0
GO:0045028	G-protein coupled purinergic nucleotide receptor activity	NA	NA	molecular_function	0.000867457	NA	P2RY13	1	0	NA	0	0
GO:0051965	positive regulation of synapse assembly	NA	NA	biological_process	0.0194868	NA	SLITRK4	0	1	NA	0	0
GO:0010994	free ubiquitin chain polymerization	NA	NA	biological_process	0.000160215	NA	UBE2C	0	1	NA	0	0
GO:0004129	cytochrome-c oxidase activity	Cataract	0	molecular_function	0.00386728	NA	LOC100481225	1	0	NA	0	0
GO:0006364	rRNA processing	NA	NA	biological_process	0.0344194	NA	FRG1	0	1	NA	0	0
GO:0001503	ossification	Cataract	COL2A1	biological_process	0.0201841	NA	SOX9	0	1	NA	0	0
GO:0060018	astrocyte fate commitment	NA	NA	biological_process	4.83169e-05	NA	SOX9	0	1	NA	0	0
GO:0042379	chemokine receptor binding	NA	NA	molecular_function	9.63811e-05	NA	CCL19	0	1	NA	0	0
GO:0046533	negative regulation of photoreceptor cell differentiation	NA	NA	biological_process	1.61479e-05	NA	SOX9	0	1	NA	0	0
GO:0006338	chromatin remodeling	Cataract	0	biological_process	0.00231478	NA	SOX9;HMGB1	0	2	NA	0	0
GO:0001077	transcriptional activator activity, RNA polymerase II core promoter proximal region sequence-specific binding	Cataract, posterior polar, 4;Cataract	PITX3	molecular_function	0.022134	0.435407	SOX9;NKX2-5	1	1	NKX2-5	1	0
GO:0003682	chromatin binding	Cataract	ERCC6	molecular_function	0.0289335	0.547749	SOX9;HMGB1;NKX2-5	1	2	GMNC;NKX2-5	2	0
GO:0006309	apoptotic DNA fragmentation	Cataract	0	biological_process	0.000570767	NA	FOXL2	0	1	NA	0	0
GO:0001046	core promoter sequence-specific DNA binding	NA	NA	molecular_function	0.00354021	NA	SOX9	0	1	NA	0	0
GO:0001541	ovarian follicle development	Cataract	ATM	biological_process	0.00322677	NA	FOXL2	0	1	NA	0	0
GO:0007409	axonogenesis	NA	NA	biological_process	0.0208918	0.104199	SLITRK4	0	1	CDK5	0	1
GO:0031901	early endosome membrane	PARTIAL LIPODYSTROPHY, CONGENITAL CATARACTS, AND NEURODEGENERATION SYNDROME	CAV1	cellular_component	0.0046239	0.200585	PLEKHF2;MMGT1	1	1	EEA1	1	0
GO:0007010	cytoskeleton organization	Cataract, Nuclear Diffuse Nonprogressive;Cataract, Cortical, Juvenile-Onset;Cataract, Autosomal Dominant, Multiple Types 1;Cataract;CATARACT 45	BFSP2;SIPA1L3;BFSP1;VIM	biological_process	0.042635	NA	SOX9	0	1	NA	0	0
GO:0051209	release of sequestered calcium ion into cytosol	NA	NA	biological_process	0.00142404	NA	CCL19	0	1	NA	0	0
GO:0016042	lipid catabolic process	Cataract	0	biological_process	0.031836	0.15079	LPL	1	0	LOC109488611	1	0
GO:0007194	negative regulation of adenylate cyclase activity	NA	NA	biological_process	0.00322677	NA	P2RY13	1	0	NA	0	0
GO:0010976	positive regulation of neuron projection development	Cataract	0	biological_process	0.0181236	NA	HMGB1	0	1	NA	0	0
GO:0008201	heparin binding	NA	NA	molecular_function	0.00840481	NA	LPL;HMGB1	1	1	NA	0	0
GO:0071300	cellular response to retinoic acid	Cataract	ATM;COL2A1	biological_process	0.0119615	NA	SOX9	0	1	NA	0	0
GO:0006261	DNA-dependent DNA replication	NA	NA	biological_process	0.00142404	NA	ORC6	1	0	NA	0	0
GO:0005484	SNAP receptor activity	NA	NA	molecular_function	0.00696141	NA	STX19	1	0	NA	0	0
GO:0007595	lactation	PARTIAL LIPODYSTROPHY, CONGENITAL CATARACTS, AND NEURODEGENERATION SYNDROME	CAV1	biological_process	0.00211163	NA	CSN3	1	0	NA	0	0
GO:0004984	olfactory receptor activity	NA	NA	molecular_function	0.000180567	0.372651	LOC100480363;LOC100476684;LOC100469549;LOC100470057	4	0	LOC100473797	1	0
GO:0050680	negative regulation of epithelial cell proliferation	NA	NA	biological_process	0.0093099	NA	SOX9	0	1	NA	0	0
GO:0008013	beta-catenin binding	PARTIAL LIPODYSTROPHY, CONGENITAL CATARACTS, AND NEURODEGENERATION SYNDROME	CAV1	molecular_function	0.0142925	0.0740061	SOX9	0	1	SOX17	0	1
GO:0090184	positive regulation of kidney development	NA	NA	biological_process	4.83169e-05	NA	SOX9	0	1	NA	0	0
GO:0045807	positive regulation of endocytosis	PARTIAL LIPODYSTROPHY, CONGENITAL CATARACTS, AND NEURODEGENERATION SYNDROME	CAV1	biological_process	0.000867457	NA	CCL19	0	1	NA	0	0
GO:0070384	Harderian gland development	NA	NA	biological_process	4.83169e-05	NA	SOX9	0	1	NA	0	0
GO:0050911	detection of chemical stimulus involved in sensory perception of smell	NA	NA	biological_process	0.00653651	0.240886	LOC100480363;LOC100476684	2	0	LOC100473797	1	0
GO:0070936	protein K48-linked ubiquitination	NA	NA	biological_process	0.0149036	0.0768798	UBE2C	0	1	LOC100466049	1	0
GO:0001768	establishment of T cell polarity	NA	NA	biological_process	9.63811e-05	NA	CCL19	0	1	NA	0	0
GO:0071599	otic vesicle development	Cataract	COL2A1	biological_process	0.000160215	NA	SOX9	0	1	NA	0	0
GO:0004930	G-protein coupled receptor activity	NA	NA	molecular_function	5.57108e-05	0.64651	GPR88;TAAR9;LOC100480363;LOC100476684;LOC100469549;LOC100470057;SUCNR1	6	1	LOC100478332;LOC100473797	1	1
GO:0031175	neuron projection development	Cataract	0	biological_process	0.0398211	0.182544	HMGB1	0	1	CDK5	0	1
GO:0061036	positive regulation of cartilage development	NA	NA	biological_process	0.000334694	NA	SOX9	0	1	NA	0	0
GO:0002074	extraocular skeletal muscle development	NA	NA	biological_process	4.83169e-05	NA	FOXL2	0	1	NA	0	0
GO:0061145	lung smooth muscle development	NA	NA	biological_process	1.61479e-05	NA	SOX9	0	1	NA	0	0
GO:0045732	positive regulation of protein catabolic process	Cataract	0	biological_process	0.0142925	0.0740061	SOX9	0	1	SOX17	0	1
GO:0007205	protein kinase C-activating G-protein coupled receptor signaling pathway	NA	NA	biological_process	NA	0.0274418	NA	0	0	LOC100476759	1	0
GO:0051694	pointed-end actin filament capping	NA	NA	biological_process	NA	0.0020067	NA	0	0	LMOD2	1	0
GO:0032436	positive regulation of proteasomal ubiquitin-dependent protein catabolic process	Cataract	0	biological_process	NA	0.00683007	NA	0	0	PSMD10;LRRK2	1	1
GO:0051443	positive regulation of ubiquitin-protein transferase activity	NA	NA	biological_process	NA	0.0121736	NA	0	0	DCUN1D5	1	0
GO:0090201	negative regulation of release of cytochrome c from mitochondria	Cataract	0	biological_process	NA	0.00421635	NA	0	0	PSMD10	0	1
GO:0005747	mitochondrial respiratory chain complex I	NA	NA	cellular_component	NA	0.0380172	NA	0	0	NDUFA9	1	0
GO:0000460	maturation of 5.8S rRNA	NA	NA	biological_process	NA	0.00265811	NA	0	0	MPHOSPH6	1	0
GO:0003756	protein disulfide isomerase activity	Cataract	0	molecular_function	NA	0.0108116	NA	0	0	ERP44	1	0
GO:0044237	cellular metabolic process	Cataract	0	biological_process	NA	0.00213563	NA	0	0	PDP1;PDK1	2	0
GO:0014044	Schwann cell development	Cataract	0	biological_process	NA	0.000584755	NA	0	0	CDK5	0	1
GO:0032839	dendrite cytoplasm	Polyneuropathy, Hearing Loss, Ataxia, Retinitis Pigmentosa, And Cataract	ABHD12	cellular_component	NA	0.00421635	NA	0	0	LRRK2	1	0
GO:0051974	negative regulation of telomerase activity	NA	NA	biological_process	NA	0.000968205	NA	0	0	PINX1	1	0
GO:0005216	ion channel activity	NA	NA	molecular_function	NA	0.00716639	NA	0	0	FXYD7	0	1
GO:0060537	muscle tissue development	NA	NA	biological_process	NA	0	NA	0	0	SRPK3	0	1
GO:2000353	positive regulation of endothelial cell apoptotic process	NA	NA	biological_process	NA	5.24759e-05	NA	0	0	RGCC;ECSCR	2	0
GO:0033209	tumor necrosis factor-mediated signaling pathway	NA	NA	biological_process	NA	0.00839532	NA	0	0	PSMD10;EDA2R	0	2
GO:0051092	positive regulation of NF-kappaB transcription factor activity	Cataract	0	biological_process	NA	0.00607258	NA	0	0	RHEBL1;EDA2R;LOC100483636	1	2
GO:0004872	receptor activity	NA	NA	molecular_function	0.0862882	0.00727424	LOC100476689	1	0	EDA2R;MED17;OGFRL1;BTLA	3	1
GO:0043204	perikaryon	CATARACT 16, MULTIPLE TYPES;Cataract	CRYAB	cellular_component	NA	0.00424245	NA	0	0	TMEM100;LRRK2;CDK5	2	1
GO:0097361	CIA complex	NA	NA	cellular_component	NA	0.000294308	NA	0	0	FAM96B	1	0
GO:0016310	phosphorylation	Cataract and cardiomyopathy;CATARACT 38;Cataract;CATARACT 6, MULTIPLE TYPES	ATM;EPHA2;GALK1;AGK	biological_process	NA	0.00148688	NA	0	0	PGM2L1;CDK5	0	2
GO:0030316	osteoclast differentiation	CATARACT 6, MULTIPLE TYPES	EPHA2	biological_process	NA	0.0136065	NA	0	0	OSTM1	1	0
GO:0072091	regulation of stem cell proliferation	NA	NA	biological_process	NA	0.000584755	NA	0	0	SOX17	0	1
GO:0015026	coreceptor activity	NA	NA	molecular_function	NA	0.0108116	NA	0	0	ACVR2A	1	0
GO:0017157	regulation of exocytosis	NA	NA	biological_process	NA	0.0274418	NA	0	0	LOC100480531	0	1
GO:0032395	MHC class II receptor activity	NA	NA	molecular_function	NA	0.000968205	NA	0	0	LOC100463889	1	0
GO:0032467	positive regulation of cytokinesis	NA	NA	biological_process	NA	0.0274418	NA	0	0	KIF20B	1	0
GO:0016226	iron-sulfur cluster assembly	NA	NA	biological_process	NA	0.000258343	NA	0	0	IBA57;FAM96B	1	1
GO:0051930	regulation of sensory perception of pain	NA	NA	biological_process	NA	0.0121736	NA	0	0	TMEM100	1	0
GO:0050848	regulation of calcium-mediated signaling	Cataract	0	biological_process	NA	0.000968205	NA	0	0	TMEM100	1	0
GO:0016740	transferase activity	Cataract and cardiomyopathy;CATARACT 38;CATARACT 13 WITH ADULT i PHENOTYPE;Cataract;CATARACT 6, MULTIPLE TYPES	ATM;EPHA2;GALK1;GCNT2;AGK	molecular_function	NA	0.0236078	NA	0	0	IBA57	0	1
GO:0042789	mRNA transcription from RNA polymerase II promoter	Cataract, Autosomal Recessive Congenital 3	FOXE3	biological_process	NA	0.00339525	NA	0	0	SOX17	0	1
GO:0032998	Fc-epsilon receptor I complex	NA	NA	cellular_component	NA	0.000294308	NA	0	0	LOC100476759	1	0
GO:0002376	immune system process	Cataract	ATM	biological_process	NA	0.0200164	NA	0	0	PTMS	0	1
GO:0034211	GTP-dependent protein kinase activity	NA	NA	molecular_function	NA	0	NA	0	0	LRRK2	1	0
GO:2000035	regulation of stem cell division	NA	NA	biological_process	NA	9.87507e-05	NA	0	0	SOX17	0	1
GO:0000178	exosome (RNase complex)	NA	NA	cellular_component	NA	0.00511971	NA	0	0	MPHOSPH6	1	0
GO:0003143	embryonic heart tube morphogenesis	NA	NA	biological_process	NA	0.0014428	NA	0	0	SOX17	0	1
GO:0006796	phosphate-containing compound metabolic process	NA	NA	biological_process	NA	0.00610362	NA	0	0	INPP1	0	1
GO:0050710	negative regulation of cytokine secretion	NA	NA	biological_process	NA	0.00339525	NA	0	0	RGCC	1	0
GO:0006265	DNA topological change	NA	NA	biological_process	NA	0.0014428	NA	0	0	TOP2B	1	0
GO:0060913	cardiac cell fate determination	NA	NA	biological_process	NA	0.000294308	NA	0	0	SOX17	0	1
GO:0046642	negative regulation of alpha-beta T cell proliferation	NA	NA	biological_process	NA	9.87507e-05	NA	0	0	BTLA	1	0
GO:0002768	immune response-regulating cell surface receptor signaling pathway	NA	NA	biological_process	NA	0.000294308	NA	0	0	BTLA	1	0
GO:0000151	ubiquitin ligase complex	NA	NA	cellular_component	NA	0.0281603	NA	0	0	DCUN1D5;MED23	2	0
GO:0035605	peptidyl-cysteine S-nitrosylase activity	NA	NA	molecular_function	NA	0.0014428	NA	0	0	LOC100463747	1	0
GO:0001518	voltage-gated sodium channel complex	NA	NA	cellular_component	NA	0.00830639	NA	0	0	SCN3A	1	0
GO:0051402	neuron apoptotic process	Cataract	ATM	biological_process	NA	0.00148688	NA	0	0	LOC100463747;CDK5	1	1
GO:0048007	antigen processing and presentation, exogenous lipid antigen via MHC class Ib	NA	NA	biological_process	NA	0.00511971	NA	0	0	LOC109488338	1	0
GO:1902035	positive regulation of hematopoietic stem cell proliferation	NA	NA	biological_process	NA	0.000294308	NA	0	0	N4BP2L2	1	0
GO:0016591	DNA-directed RNA polymerase II, holoenzyme	NA	NA	cellular_component	NA	0.0014428	NA	0	0	RPAP2	1	0
GO:0004441	inositol-1,4-bisphosphate 1-phosphatase activity	NA	NA	molecular_function	NA	0	NA	0	0	INPP1	0	1
GO:0045956	positive regulation of calcium ion-dependent exocytosis	NA	NA	biological_process	NA	0.00716639	NA	0	0	CDK5	0	1
GO:0070509	calcium ion import	Cataract	0	biological_process	NA	0.0236078	NA	0	0	CDK5	0	1
GO:0048643	positive regulation of skeletal muscle tissue development	NA	NA	biological_process	NA	0.00339525	NA	0	0	SOX17	0	1
GO:0070940	dephosphorylation of RNA polymerase II C-terminal domain	Congenital Cataracts, Facial Dysmorphism, And Neuropathy	CTDP1	biological_process	NA	0.000968205	NA	0	0	RPAP2	1	0
GO:0050999	regulation of nitric-oxide synthase activity	Cataract;PARTIAL LIPODYSTROPHY, CONGENITAL CATARACTS, AND NEURODEGENERATION SYNDROME	CAV1;0	biological_process	NA	0.00421635	NA	0	0	ACVR2A	1	0
GO:0035035	histone acetyltransferase binding	NA	NA	molecular_function	NA	0.0020067	NA	0	0	TRIM68	1	0
GO:0032967	positive regulation of collagen biosynthetic process	Cataract, Nuclear Diffuse Nonprogressive;Cataract	VIM	biological_process	NA	0.00511971	NA	0	0	RGCC	1	0
GO:0030426	growth cone	Cataract	NDRG2	cellular_component	NA	0.0443609	NA	0	0	LRRK2;CDK5	1	1
GO:0002673	regulation of acute inflammatory response	NA	NA	biological_process	NA	0.000294308	NA	0	0	LOC100478332	0	1
GO:0004741	[pyruvate dehydrogenase (lipoamide)] phosphatase activity	NA	NA	molecular_function	NA	9.87507e-05	NA	0	0	PDP1	1	0
GO:2000300	regulation of synaptic vesicle exocytosis	NA	NA	biological_process	NA	0.0014428	NA	0	0	LRRK2	1	0
GO:0006090	pyruvate metabolic process	Cataract	0	biological_process	NA	0.000494847	NA	0	0	PDP1;PDK1	2	0
GO:0072593	reactive oxygen species metabolic process	Cataract and cardiomyopathy;Cataract	0;SOD2	biological_process	NA	0.0236078	NA	0	0	LRRK2	1	0
GO:0005539	glycosaminoglycan binding	NA	NA	molecular_function	NA	0.00716639	NA	0	0	SPOCK3	1	0
GO:0071773	cellular response to BMP stimulus	Cataract	COL2A1	biological_process	NA	0.0151087	NA	0	0	TMEM100	1	0
GO:1900017	positive regulation of cytokine production involved in inflammatory response	Cataract	0	biological_process	NA	0.00339525	NA	0	0	LOC100483636	1	0
GO:0045022	early endosome to late endosome transport	NA	NA	biological_process	NA	0.0121736	NA	0	0	EEA1	1	0
GO:0060294	cilium movement involved in cell motility	NA	NA	biological_process	NA	0.000294308	NA	0	0	SPAG16	1	0
GO:0044308	axonal spine	NA	NA	cellular_component	NA	0.000584755	NA	0	0	EEA1	1	0
GO:0051012	microtubule sliding	NA	NA	biological_process	NA	0	NA	0	0	SPAG16	1	0
GO:0002474	antigen processing and presentation of peptide antigen via MHC class I	NA	NA	biological_process	NA	0.0498797	NA	0	0	PSMD10	0	1
GO:1901800	positive regulation of proteasomal protein catabolic process	Cataract	0	biological_process	NA	0.00511971	NA	0	0	ECSCR	1	0
GO:0008893	guanosine-3',5'-bis(diphosphate) 3'-diphosphatase activity	NA	NA	molecular_function	NA	0	NA	0	0	HDDC3	0	1
GO:0072014	proximal tubule development	NA	NA	biological_process	NA	0.000294308	NA	0	0	AQP11	1	0
GO:0002039	p53 binding	NA	NA	molecular_function	NA	0.0449901	NA	0	0	CDK5	0	1
GO:0000228	nuclear chromosome	NA	NA	cellular_component	NA	0.0108116	NA	0	0	PINX1	1	0
GO:0042594	response to starvation	NA	NA	biological_process	NA	0.0121736	NA	0	0	HDDC3	0	1
GO:0070997	neuron death	Cataract	0	biological_process	NA	0.00511971	NA	0	0	LRRK2	1	0
GO:0008307	structural constituent of muscle	NA	NA	molecular_function	NA	0.0254952	NA	0	0	PDLIM3	1	0
GO:1903217	negative regulation of protein processing involved in protein targeting to mitochondrion	NA	NA	biological_process	NA	0	NA	0	0	LRRK2	1	0
GO:0030884	exogenous lipid antigen binding	NA	NA	molecular_function	NA	0.00421635	NA	0	0	LOC109488338	1	0
GO:0018105	peptidyl-serine phosphorylation	Cataract	ATM	biological_process	NA	0.0292704	NA	0	0	LRRK2;CDK5	1	1
GO:0042605	peptide antigen binding	NA	NA	molecular_function	NA	0.0121736	NA	0	0	LOC100463889	1	0
GO:0006391	transcription initiation from mitochondrial promoter	NA	NA	biological_process	NA	0.000294308	NA	0	0	TFB2M	1	0
GO:0001972	retinoic acid binding	NA	NA	molecular_function	NA	0.00265811	NA	0	0	LOC105239870	0	1
GO:0007088	regulation of mitotic nuclear division	NA	NA	biological_process	NA	0.0166787	NA	0	0	KIF20B	1	0
GO:0010862	positive regulation of pathway-restricted SMAD protein phosphorylation	NA	NA	biological_process	NA	0.0166787	NA	0	0	ACVR2A	1	0
GO:2000649	regulation of sodium ion transmembrane transporter activity	NA	NA	biological_process	NA	0.00511971	NA	0	0	FXYD7	0	1
GO:0060214	endocardium formation	NA	NA	biological_process	NA	0.000294308	NA	0	0	SOX17	0	1
GO:0043525	positive regulation of neuron apoptotic process	Cataract, posterior polar, 4;Cataract	ATM;PITX3	biological_process	NA	0.0217811	NA	0	0	CDK5	0	1
GO:0003308	negative regulation of Wnt signaling pathway involved in heart development	NA	NA	biological_process	NA	0	NA	0	0	SOX17	0	1
GO:0032526	response to retinoic acid	NA	NA	biological_process	NA	0.0274418	NA	0	0	SLC10A3	0	1
GO:0010668	ectodermal cell differentiation	NA	NA	biological_process	NA	0.000968205	NA	0	0	EDA2R	0	1
GO:1901006	ubiquinone-6 biosynthetic process	NA	NA	biological_process	NA	0	NA	0	0	NDUFA9	1	0
GO:0030218	erythrocyte differentiation	NA	NA	biological_process	NA	0.0402917	NA	0	0	CASP3	1	0
GO:0061010	gall bladder development	NA	NA	biological_process	NA	0.000294308	NA	0	0	SOX17	0	1
GO:0008081	phosphoric diester hydrolase activity	NA	NA	molecular_function	NA	0.0020067	NA	0	0	LOC109488611	1	0
GO:0021695	cerebellar cortex development	NA	NA	biological_process	NA	0.0014428	NA	0	0	CDK5	0	1
GO:0043537	negative regulation of blood vessel endothelial cell migration	RETINAL DYSTROPHY AND IRIS COLOBOMA WITH OR WITHOUT CONGENITAL CATARACT	MIR204	biological_process	NA	0.0020067	NA	0	0	RGCC	1	0
GO:0043068	positive regulation of programmed cell death	NA	NA	biological_process	NA	0.000968205	NA	0	0	LRRK2	1	0
GO:0016189	synaptic vesicle to endosome fusion	NA	NA	biological_process	NA	0	NA	0	0	EEA1	1	0
GO:0005507	copper ion binding	NA	NA	molecular_function	NA	0.0402917	NA	0	0	HEPHL1	1	0
GO:0043125	ErbB-3 class receptor binding	NA	NA	molecular_function	NA	0.000294308	NA	0	0	CDK5	0	1
GO:0097200	cysteine-type endopeptidase activity involved in execution phase of apoptosis	NA	NA	molecular_function	NA	9.87507e-05	NA	0	0	CASP3	1	0
GO:0030239	myofibril assembly	CATARACT 43	UNC45B	biological_process	NA	0.00421635	NA	0	0	LMOD2	1	0
GO:0035249	synaptic transmission, glutamatergic	NA	NA	biological_process	NA	0.0315075	NA	0	0	CDK5	0	1
GO:0070682	proteasome regulatory particle assembly	NA	NA	biological_process	NA	0.000584755	NA	0	0	PSMD10	0	1
GO:0008203	cholesterol metabolic process	Cataract	0	biological_process	NA	0.00545343	NA	0	0	PCTP;LOC100476613	0	2
GO:0003198	epithelial to mesenchymal transition involved in endocardial cushion formation	NA	NA	biological_process	NA	0.000968205	NA	0	0	TMEM100	1	0
GO:0060078	regulation of postsynaptic membrane potential	NA	NA	biological_process	NA	0.000294308	NA	0	0	CDK5	0	1
GO:0004494	methylmalonyl-CoA mutase activity	NA	NA	molecular_function	NA	0	NA	0	0	MUT	0	1
GO:0010596	negative regulation of endothelial cell migration	NA	NA	biological_process	NA	0.00610362	NA	0	0	LOC105239870	0	1
GO:0001945	lymph vessel development	NA	NA	biological_process	NA	0.0014428	NA	0	0	LOC105239870	0	1
GO:0004181	metallocarboxypeptidase activity	NA	NA	molecular_function	NA	0.0254952	NA	0	0	CPA3	0	1
GO:0051972	regulation of telomerase activity	NA	NA	biological_process	NA	0	NA	0	0	PINX1	1	0
GO:0032092	positive regulation of protein binding	PARTIAL LIPODYSTROPHY, CONGENITAL CATARACTS, AND NEURODEGENERATION SYNDROME	CAV1	biological_process	NA	0.00356019	NA	0	0	LRRK2;CDK5	1	1
GO:0045329	carnitine biosynthetic process	NA	NA	biological_process	NA	0.000584755	NA	0	0	BBOX1	1	0
GO:0001937	negative regulation of endothelial cell proliferation	PARTIAL LIPODYSTROPHY, CONGENITAL CATARACTS, AND NEURODEGENERATION SYNDROME	CAV1	biological_process	NA	0.000596502	NA	0	0	LOC105239870;RGCC	1	1
GO:1901991	negative regulation of mitotic cell cycle phase transition	NA	NA	biological_process	NA	9.87507e-05	NA	0	0	RGCC	1	0
GO:0042590	antigen processing and presentation of exogenous peptide antigen via MHC class I	NA	NA	biological_process	NA	0.0183151	NA	0	0	PSMD10	0	1
GO:0030889	negative regulation of B cell proliferation	Cataract	ATM	biological_process	NA	0.00339525	NA	0	0	BTLA	1	0
GO:0030295	protein kinase activator activity	NA	NA	molecular_function	NA	0.00952199	NA	0	0	RGCC	1	0
GO:1902037	negative regulation of hematopoietic stem cell differentiation	NA	NA	biological_process	NA	9.87507e-05	NA	0	0	N4BP2L2	1	0
GO:0086010	membrane depolarization during action potential	NA	NA	biological_process	NA	0.0254952	NA	0	0	SCN3A	1	0
GO:0002003	angiotensin maturation	NA	NA	biological_process	NA	0.000584755	NA	0	0	CPA3	0	1
GO:0032801	receptor catabolic process	NA	NA	biological_process	NA	0.00610362	NA	0	0	CDK5	0	1
GO:0060914	heart formation	Cataract;CATARACT 46, JUVENILE-ONSET	0;LEMD2	biological_process	NA	0.0014428	NA	0	0	SOX17	0	1
GO:0035640	exploration behavior	NA	NA	biological_process	NA	0.00421635	NA	0	0	LRRK2	1	0
GO:0006376	mRNA splice site selection	NA	NA	biological_process	NA	0.00610362	NA	0	0	LUC7L3	1	0
GO:0005838	proteasome regulatory particle	NA	NA	cellular_component	NA	0.000968205	NA	0	0	PSMD10	0	1
GO:0006783	heme biosynthetic process	NA	NA	biological_process	NA	0.0108116	NA	0	0	IBA57	0	1
GO:0007015	actin filament organization	Cataract, Autosomal Dominant;Cataract	CRYAA	biological_process	NA	0.0107848	NA	0	0	PDLIM3;LMOD2	2	0
GO:0050681	androgen receptor binding	NA	NA	molecular_function	NA	0.00952199	NA	0	0	TRIM68	1	0
GO:0008728	GTP diphosphokinase activity	NA	NA	molecular_function	NA	0	NA	0	0	HDDC3	0	1
GO:0072537	fibroblast activation	NA	NA	biological_process	NA	0.000294308	NA	0	0	RGCC	1	0
GO:0001702	gastrulation with mouth forming second	NA	NA	biological_process	NA	0.0121736	NA	0	0	ACVR2A	1	0
GO:0003865	3-oxo-5-alpha-steroid 4-dehydrogenase activity	NA	NA	molecular_function	NA	0.000294308	NA	0	0	SRD5A3	0	1
GO:0003918	DNA topoisomerase type II (ATP-hydrolyzing) activity	NA	NA	molecular_function	NA	9.87507e-05	NA	0	0	TOP2B	1	0
GO:0030141	secretory granule	NA	NA	cellular_component	NA	0.00839532	NA	0	0	CPA3;LOC100480531	0	2
GO:0051439	regulation of ubiquitin-protein ligase activity involved in mitotic cell cycle	NA	NA	biological_process	NA	0.0217811	NA	0	0	PSMD10	0	1
GO:0016651	oxidoreductase activity, acting on NAD(P)H	NA	NA	molecular_function	NA	0.000584755	NA	0	0	DECR1	1	0
GO:0051437	positive regulation of ubiquitin-protein ligase activity involved in regulation of mitotic cell cycle transition	NA	NA	biological_process	NA	0.0217811	NA	0	0	PSMD10	0	1
GO:0030501	positive regulation of bone mineralization	NA	NA	biological_process	NA	0.0380172	NA	0	0	ACVR2A	1	0
GO:0090272	negative regulation of fibroblast growth factor production	NA	NA	biological_process	NA	9.87507e-05	NA	0	0	RGCC	1	0
GO:0008306	associative learning	NA	NA	biological_process	NA	0.0166787	NA	0	0	CDK5	0	1
GO:0021766	hippocampus development	Cataract	0	biological_process	NA	0.0426164	NA	0	0	CDK5	0	1
GO:0006426	glycyl-tRNA aminoacylation	NA	NA	biological_process	NA	0	NA	0	0	GARS	1	0
GO:0043523	regulation of neuron apoptotic process	NA	NA	biological_process	NA	0.00610362	NA	0	0	EGLN3	1	0
GO:0006914	autophagy	Cataract;Cataract, posterior polar, 3;Absent corpus callosum cataract immunodeficiency	CHMP4B;EPG5;0	biological_process	NA	0.0402856	NA	0	0	LRRK2;UBQLN2	1	1
GO:0006006	glucose metabolic process	Cataract	0	biological_process	NA	0.00379789	NA	0	0	LOC100463747;PDK1;PGM2L1	2	1
GO:0031929	TOR signaling	NA	NA	biological_process	NA	0.00265811	NA	0	0	RHEBL1	0	1
GO:1903125	negative regulation of thioredoxin peroxidase activity by peptidyl-threonine phosphorylation	NA	NA	biological_process	NA	0	NA	0	0	LRRK2	1	0
GO:0090263	positive regulation of canonical Wnt signaling pathway	PARTIAL LIPODYSTROPHY, CONGENITAL CATARACTS, AND NEURODEGENERATION SYNDROME	CAV1	biological_process	NA	0.0304034	NA	0	0	PSMD10;ASPM	1	1
GO:0030522	intracellular receptor signaling pathway	NA	NA	biological_process	NA	0.0183151	NA	0	0	LOC105239870	0	1
GO:0045769	negative regulation of asymmetric cell division	NA	NA	biological_process	NA	0	NA	0	0	ASPM	1	0
GO:0007077	mitotic nuclear envelope disassembly	NA	NA	biological_process	NA	0.0166787	NA	0	0	NEK9	1	0
GO:0031821	G-protein coupled serotonin receptor binding	NA	NA	molecular_function	NA	0.000584755	NA	0	0	GNAI1	1	0
GO:0000472	endonucleolytic cleavage to generate mature 5'-end of SSU-rRNA from (SSU-rRNA, 5.8S rRNA, LSU-rRNA)	NA	NA	biological_process	NA	0.000294308	NA	0	0	ABT1	1	0
GO:0070412	R-SMAD binding	NA	NA	molecular_function	NA	0.00610362	NA	0	0	RGCC	1	0
GO:0000165	MAPK cascade	Cataract	0	biological_process	0.0791012	0.0280375	LOC100481822	0	1	WDR83;PSMD10;LRRK2	1	2
GO:0045603	positive regulation of endothelial cell differentiation	NA	NA	biological_process	NA	0.0014428	NA	0	0	TMEM100	1	0
GO:1902711	GABA-A receptor complex	NA	NA	cellular_component	NA	0.000326398	NA	0	0	GABRG1;LOC105234775	2	0
GO:0031386	protein tag	NA	NA	molecular_function	NA	0.00339525	NA	0	0	NFATC2IP	0	1
GO:0051436	negative regulation of ubiquitin-protein ligase activity involved in mitotic cell cycle	NA	NA	biological_process	NA	0.0200164	NA	0	0	PSMD10	0	1
GO:0006853	carnitine shuttle	Cataract	0	biological_process	NA	0.0014428	NA	0	0	SLC25A20	1	0
GO:0033120	positive regulation of RNA splicing	NA	NA	biological_process	NA	0.00421635	NA	0	0	LOC100483526	0	1
GO:0060135	maternal process involved in female pregnancy	Cataract	AKR1B1	biological_process	NA	0.0020067	NA	0	0	LOC100476613	0	1
GO:2000172	regulation of branching morphogenesis of a nerve	NA	NA	biological_process	NA	9.87507e-05	NA	0	0	LRRK2	1	0
GO:0007080	mitotic metaphase plate congression	Cataract, posterior polar, 3	CHMP4B	biological_process	NA	0.0380172	NA	0	0	PINX1	1	0
GO:0005176	ErbB-2 class receptor binding	NA	NA	molecular_function	NA	9.87507e-05	NA	0	0	CDK5	0	1
GO:0005834	heterotrimeric G-protein complex	NA	NA	cellular_component	NA	0.0498797	NA	0	0	GNAI1	1	0
GO:0019767	IgE receptor activity	NA	NA	molecular_function	NA	0.000294308	NA	0	0	LOC100476759	1	0
GO:0071004	U2-type prespliceosome	NA	NA	cellular_component	NA	0.00830639	NA	0	0	LUC7L3	1	0
GO:0004708	MAP kinase kinase activity	NA	NA	molecular_function	NA	0.0108116	NA	0	0	LRRK2	1	0
GO:0006986	response to unfolded protein	NA	NA	biological_process	NA	0.0217811	NA	0	0	ERP44	1	0
GO:0006635	fatty acid beta-oxidation	Cataract	0	biological_process	NA	0.0402917	NA	0	0	DECR1	1	0
GO:0004820	glycine-tRNA ligase activity	NA	NA	molecular_function	NA	0	NA	0	0	GARS	1	0
GO:0001100	negative regulation of exit from mitosis	NA	NA	biological_process	NA	0	NA	0	0	RGCC	1	0
GO:0010718	positive regulation of epithelial to mesenchymal transition	CATARACT 13 WITH ADULT i PHENOTYPE;Cataract	0;GCNT2	biological_process	NA	0.0121736	NA	0	0	RGCC	1	0
GO:0007289	spermatid nucleus differentiation	NA	NA	biological_process	NA	0.0014428	NA	0	0	PYGO1	0	1
GO:0010521	telomerase inhibitor activity	NA	NA	molecular_function	NA	0.000294308	NA	0	0	PINX1	1	0
GO:0008340	determination of adult lifespan	Cataract and cardiomyopathy;Cataract	ATM;SOD2	biological_process	NA	0.0020067	NA	0	0	LRRK2	1	0
GO:0048589	developmental growth	Cataract	0	biological_process	NA	0.0151087	NA	0	0	ASPM	1	0
GO:0006383	transcription from RNA polymerase III promoter	NA	NA	biological_process	NA	0.0357942	NA	0	0	SNAPC1	1	0
GO:2001224	positive regulation of neuron migration	NA	NA	biological_process	NA	0.0014428	NA	0	0	KIF20B	1	0
GO:0007528	neuromuscular junction development	NA	NA	biological_process	NA	0.0151087	NA	0	0	LRRK2	1	0
GO:0000781	chromosome, telomeric region	Cataract	ATM	cellular_component	NA	0.0236078	NA	0	0	PINX1	1	0
GO:0003331	positive regulation of extracellular matrix constituent secretion	NA	NA	biological_process	NA	9.87507e-05	NA	0	0	RGCC	1	0
GO:0004693	cyclin-dependent protein serine/threonine kinase activity	NA	NA	molecular_function	NA	0.0274418	NA	0	0	CDK5	0	1
GO:0042074	cell migration involved in gastrulation	NA	NA	biological_process	NA	0.0020067	NA	0	0	SOX17	0	1
GO:0061009	common bile duct development	NA	NA	biological_process	NA	9.87507e-05	NA	0	0	SOX17	0	1
GO:0060333	interferon-gamma-mediated signaling pathway	NA	NA	biological_process	NA	0.00265197	NA	0	0	TRIM68;LOC100463889	2	0
GO:0071287	cellular response to manganese ion	NA	NA	biological_process	NA	9.87507e-05	NA	0	0	LRRK2	1	0
GO:0009956	radial pattern formation	NA	NA	biological_process	NA	9.87507e-05	NA	0	0	LOC105239870	0	1
GO:0007005	mitochondrion organization	Cataract and cardiomyopathy;Cataract, Autosomal Dominant;Cataract	CRYAA;SOD2	biological_process	NA	0.0142715	NA	0	0	LRRK2;PPRC1	2	0
GO:0001764	neuron migration	NA	NA	biological_process	NA	0.0116033	NA	0	0	LOC105239870;CDK5;ASPM	1	2
GO:0051279	regulation of release of sequestered calcium ion into cytosol	NA	NA	biological_process	NA	0.00511971	NA	0	0	LOC100476759	1	0
GO:0070847	core mediator complex	NA	NA	cellular_component	NA	0.00265811	NA	0	0	MED17	1	0
GO:0021873	forebrain neuroblast division	NA	NA	biological_process	NA	9.87507e-05	NA	0	0	ASPM	1	0
GO:0007040	lysosome organization	Cataract	0	biological_process	NA	0.0254952	NA	0	0	LRRK2	1	0
GO:0060159	regulation of dopamine receptor signaling pathway	NA	NA	biological_process	NA	9.87507e-05	NA	0	0	LRRK2	1	0
GO:0006513	protein monoubiquitination	NA	NA	biological_process	NA	0.0200164	NA	0	0	KLHL12	1	0
GO:0016525	negative regulation of angiogenesis	Cataract;CATARACT 6, MULTIPLE TYPES	EPHA2;0	biological_process	NA	0.00545343	NA	0	0	RGCC;ECSCR	2	0
GO:0007214	gamma-aminobutyric acid signaling pathway	Cataract	0	biological_process	NA	0.000596502	NA	0	0	GABRG1;LOC105234775	2	0
GO:0061001	regulation of dendritic spine morphogenesis	NA	NA	biological_process	NA	0.000110808	NA	0	0	LRRK2;CDK5	1	1
GO:0008670	2,4-dienoyl-CoA reductase (NADPH) activity	NA	NA	molecular_function	NA	9.87507e-05	NA	0	0	DECR1	1	0
GO:0097602	cullin family protein binding	NA	NA	molecular_function	NA	0.00421635	NA	0	0	DCUN1D5	1	0
GO:1902823	negative regulation of late endosome to lysosome transport	NA	NA	biological_process	NA	9.87507e-05	NA	0	0	LRRK2	1	0
GO:0060707	trophoblast giant cell differentiation	NA	NA	biological_process	NA	0.00339525	NA	0	0	LOC105239870	0	1
GO:0097150	neuronal stem cell population maintenance	NA	NA	biological_process	NA	0.00610362	NA	0	0	ASPM	1	0
GO:0031397	negative regulation of protein ubiquitination	PARTIAL LIPODYSTROPHY, CONGENITAL CATARACTS, AND NEURODEGENERATION SYNDROME	CAV1	biological_process	NA	0.0254952	NA	0	0	CDK5	0	1
GO:0001706	endoderm formation	NA	NA	biological_process	NA	0.00511971	NA	0	0	SOX17	0	1
GO:0005523	tropomyosin binding	NA	NA	molecular_function	NA	0.0020067	NA	0	0	LMOD2	1	0
GO:0007004	telomere maintenance via telomerase	NA	NA	biological_process	NA	0.0014428	NA	0	0	PINX1	1	0
GO:0031648	protein destabilization	NA	NA	biological_process	NA	0.0166787	NA	0	0	SOX17	0	1
GO:0008219	cell death	Cataract	0	biological_process	NA	0.0183151	NA	0	0	CLUL1	1	0
GO:0071818	BAT3 complex	NA	NA	cellular_component	NA	0.000968205	NA	0	0	UBL4A	0	1
GO:0007049	cell cycle	Cataract;Congenital Cataracts, Facial Dysmorphism, And Neuropathy	CTDP1;ATM	biological_process	NA	0.00800259	NA	0	0	GMNC;SEPT14;CDK5;GNAI1;TXLNG	4	1
GO:2000273	positive regulation of receptor activity	NA	NA	biological_process	NA	0.000968205	NA	0	0	CDK5	0	1
GO:0097499	protein localization to nonmotile primary cilium	NA	NA	biological_process	NA	9.87507e-05	NA	0	0	GFY	0	1
GO:0046854	phosphatidylinositol phosphorylation	NA	NA	biological_process	NA	0.0274418	NA	0	0	INPP1	0	1
GO:0070402	NADPH binding	NA	NA	molecular_function	NA	0.00339525	NA	0	0	DECR1	1	0
GO:0036479	peroxidase inhibitor activity	NA	NA	molecular_function	NA	0	NA	0	0	LRRK2	1	0
GO:0030500	regulation of bone mineralization	NA	NA	biological_process	NA	0.00610362	NA	0	0	TXLNG	1	0
GO:0050877	neurological system process	CATARACT 41	WFS1	biological_process	NA	0.0101545	NA	0	0	GABRG1;LOC105234775	2	0
GO:0003142	cardiogenic plate morphogenesis	NA	NA	biological_process	NA	0	NA	0	0	SOX17	0	1
GO:0090314	positive regulation of protein targeting to membrane	NA	NA	biological_process	NA	0.0151087	NA	0	0	CDK5	0	1
GO:0008553	hydrogen-exporting ATPase activity, phosphorylative mechanism	NA	NA	molecular_function	NA	0.0020067	NA	0	0	ATP6V1C1	1	0
GO:0005506	iron ion binding	Hyperferritinemia, hereditary, with congenital cataracts;MYOPIA, HIGH, WITH CATARACT AND VITREORETINAL DEGENERATION;MICROCEPHALY, CONGENITAL CATARACT, AND PSORIASIFORM DERMATITIS	MSMO1;P3H2;FTL	molecular_function	NA	0.0257649	NA	0	0	BBOX1;EGLN3;MSMO1	2	1
GO:0071398	cellular response to fatty acid	NA	NA	biological_process	NA	0.00511971	NA	0	0	LOC100478332	0	1
GO:0060765	regulation of androgen receptor signaling pathway	NA	NA	biological_process	NA	0.000968205	NA	0	0	TRIM68	1	0
GO:0048812	neuron projection morphogenesis	Cataract	0	biological_process	NA	0.00463732	NA	0	0	LRRK2;KIF20B	2	0
GO:0035082	axoneme assembly	NA	NA	biological_process	NA	0.0121736	NA	0	0	SPAG16	1	0
GO:0043388	positive regulation of DNA binding	NA	NA	biological_process	NA	0.00952199	NA	0	0	LOC105242099	1	0
GO:0021549	cerebellum development	3-METHYLGLUTACONIC ACIDURIA WITH CATARACTS, NEUROLOGIC INVOLVEMENT, AND NEUTROPENIA	CLPB	biological_process	NA	0.0294464	NA	0	0	CDK5	0	1
GO:2000785	regulation of autophagosome assembly	NA	NA	biological_process	NA	0.00952199	NA	0	0	UBQLN2	0	1
GO:2000114	regulation of establishment of cell polarity	NA	NA	biological_process	NA	0.0121736	NA	0	0	KIF20B	1	0
GO:0097194	execution phase of apoptosis	NA	NA	biological_process	NA	0.00421635	NA	0	0	CASP3	1	0
GO:0071816	tail-anchored membrane protein insertion into ER membrane	NA	NA	biological_process	NA	0.000968205	NA	0	0	UBL4A	0	1
GO:0042220	response to cocaine	Cataract, posterior polar, 4;Cataract	PITX3	biological_process	NA	0.00511971	NA	0	0	CDK5	0	1
GO:0006275	regulation of DNA replication	NA	NA	biological_process	NA	0.00421635	NA	0	0	ESCO1	1	0
GO:0002052	positive regulation of neuroblast proliferation	NA	NA	biological_process	NA	0.00716639	NA	0	0	ASPM	1	0
GO:0018107	peptidyl-threonine phosphorylation	NA	NA	biological_process	NA	0.00148688	NA	0	0	LRRK2;CDK5	1	1
GO:0030900	forebrain development	NA	NA	biological_process	NA	0.00683007	NA	0	0	LOC105239870;CDK5	0	2
GO:0012507	ER to Golgi transport vesicle membrane	NA	NA	cellular_component	NA	0.0236078	NA	0	0	LOC100463889	1	0
GO:0008542	visual learning	NA	NA	biological_process	NA	0.0315075	NA	0	0	CDK5	0	1
GO:0071456	cellular response to hypoxia	NA	NA	biological_process	NA	0.0201081	NA	0	0	EGLN3;RGCC	2	0
GO:0006825	copper ion transport	NA	NA	biological_process	NA	0.00265811	NA	0	0	HEPHL1	1	0
GO:0016868	intramolecular transferase activity, phosphotransferases	NA	NA	molecular_function	NA	0	NA	0	0	PGM2L1	0	1
GO:0015914	phospholipid transport	NA	NA	biological_process	NA	0.00952199	NA	0	0	PCTP	0	1
GO:0042662	negative regulation of mesodermal cell fate specification	NA	NA	biological_process	NA	9.87507e-05	NA	0	0	SOX17	0	1
GO:0004879	RNA polymerase II transcription factor activity, ligand-activated sequence-specific DNA binding	NA	NA	molecular_function	NA	0.0294464	NA	0	0	LOC105239870	0	1
GO:0050870	positive regulation of T cell activation	NA	NA	biological_process	NA	0.0014428	NA	0	0	LOC100463889	1	0
GO:0043647	inositol phosphate metabolic process	NA	NA	biological_process	NA	0.0274418	NA	0	0	INPP1	0	1
GO:0007062	sister chromatid cohesion	NA	NA	biological_process	NA	0.00511971	NA	0	0	ESCO1	1	0
GO:0016433	rRNA (adenine) methyltransferase activity	NA	NA	molecular_function	NA	0	NA	0	0	BMT2	1	0
GO:0008525	phosphatidylcholine transporter activity	NA	NA	molecular_function	NA	0.000294308	NA	0	0	PCTP	0	1
GO:0051445	regulation of meiotic cell cycle	NA	NA	biological_process	NA	9.87507e-05	NA	0	0	ASPM	1	0
GO:0016095	polyprenol catabolic process	NA	NA	biological_process	NA	0	NA	0	0	SRD5A3	0	1
GO:0097411	hypoxia-inducible factor-1alpha signaling pathway	NA	NA	biological_process	NA	9.87507e-05	NA	0	0	PDK1	1	0
GO:0021697	cerebellar cortex formation	NA	NA	biological_process	NA	0	NA	0	0	CDK5	0	1
GO:0051966	regulation of synaptic transmission, glutamatergic	NA	NA	biological_process	NA	0.0108116	NA	0	0	LRRK2	1	0
GO:0042752	regulation of circadian rhythm	Cataract	0	biological_process	NA	0.0426164	NA	0	0	NONO	0	1
GO:0030883	endogenous lipid antigen binding	NA	NA	molecular_function	NA	0.00421635	NA	0	0	LOC109488338	1	0
GO:0007519	skeletal muscle tissue development	CATARACT 43;PARTIAL LIPODYSTROPHY, CONGENITAL CATARACTS, AND NEURODEGENERATION SYNDROME	CAV1;UNC45B	biological_process	NA	0.000242571	NA	0	0	LOC105239870;SRPK3;CDK5	0	3
GO:0050805	negative regulation of synaptic transmission	NA	NA	biological_process	NA	0.000584755	NA	0	0	GNAI1	1	0
GO:0030866	cortical actin cytoskeleton organization	NA	NA	biological_process	NA	0.0136065	NA	0	0	CDK5	0	1
GO:0016234	inclusion body	NA	NA	cellular_component	NA	0.00830639	NA	0	0	LRRK2	1	0
GO:0061031	endodermal digestive tract morphogenesis	NA	NA	biological_process	NA	0.000294308	NA	0	0	SOX17	0	1
GO:0072687	meiotic spindle	NA	NA	cellular_component	NA	0.000294308	NA	0	0	ASPM	1	0
GO:0005773	vacuole	NA	NA	cellular_component	NA	0.00610362	NA	0	0	LOC100466049	1	0
GO:0002752	cell surface pattern recognition receptor signaling pathway	NA	NA	biological_process	NA	9.87507e-05	NA	0	0	LOC100478332	0	1
GO:0090316	positive regulation of intracellular protein transport	NA	NA	biological_process	NA	0.0108116	NA	0	0	KIF20B	1	0
GO:0047933	glucose-1,6-bisphosphate synthase activity	NA	NA	molecular_function	NA	0	NA	0	0	PGM2L1	0	1
GO:2000043	regulation of cardiac cell fate specification	NA	NA	biological_process	NA	0	NA	0	0	SOX17	0	1
GO:0035564	regulation of kidney size	NA	NA	biological_process	NA	0	NA	0	0	LRRK2	1	0
GO:0072001	renal system development	Cataract	AKR1B1	biological_process	NA	0.0020067	NA	0	0	SOX17	0	1
GO:0008016	regulation of heart contraction	Cataract, Zonular Pulverulent 3;Cataract	0;GJA3	biological_process	NA	0.00952199	NA	0	0	S100A1	1	0
GO:0019233	sensory perception of pain	NA	NA	biological_process	NA	0.0498797	NA	0	0	CDK5	0	1
GO:0050896	response to stimulus	Cataract, Autosomal Dominant, Multiple Types 1;Cataract, Autosomal Dominant;CATARACT 3, MULTIPLE TYPES;Cataract;Optic atrophy and cataract, autosomal dominant;Cerulean cataract;CATARACT 15, MULTIPLE TYPES	BFSP2;CRYAA;MIP;OPA3;CRYBB2	biological_process	NA	0.0166353	NA	0	0	MIP;GFY	1	1
GO:1902476	chloride transmembrane transport	Cataract	0	biological_process	NA	0.0239497	NA	0	0	GABRG1;LOC105234775	2	0
GO:0060011	Sertoli cell proliferation	NA	NA	biological_process	NA	0.000294308	NA	0	0	ACVR2A	1	0
GO:0060956	endocardial cell differentiation	NA	NA	biological_process	NA	0	NA	0	0	SOX17	0	1
GO:0021522	spinal cord motor neuron differentiation	NA	NA	biological_process	NA	0.00716639	NA	0	0	ABT1	1	0
GO:0004365	glyceraldehyde-3-phosphate dehydrogenase (NAD+) (phosphorylating) activity	NA	NA	molecular_function	NA	0.0020067	NA	0	0	LOC100463747	1	0
GO:0006833	water transport	Cataract;CATARACT 15, MULTIPLE TYPES	MIP	biological_process	NA	0.00148688	NA	0	0	AQP11;MIP	2	0
GO:0097231	cell motility in response to calcium ion	NA	NA	biological_process	NA	0	NA	0	0	SPAG16	1	0
GO:1990023	mitotic spindle midzone	NA	NA	cellular_component	NA	0.00421635	NA	0	0	KIF20B	1	0
GO:0031418	L-ascorbic acid binding	MYOPIA, HIGH, WITH CATARACT AND VITREORETINAL DEGENERATION	P3H2	molecular_function	NA	0.0151087	NA	0	0	EGLN3	1	0
GO:0021819	layer formation in cerebral cortex	NA	NA	biological_process	NA	0.00511971	NA	0	0	CDK5	0	1
GO:0034421	post-translational protein acetylation	NA	NA	biological_process	NA	0.000294308	NA	0	0	ESCO1	1	0
GO:0035327	transcriptionally active chromatin	NA	NA	cellular_component	NA	0.0136065	NA	0	0	TTC37	1	0
GO:0045995	regulation of embryonic development	NA	NA	biological_process	NA	0.00610362	NA	0	0	SOX17	0	1
GO:0051287	NAD binding	NA	NA	molecular_function	NA	0.0449901	NA	0	0	LOC100463747	1	0
GO:0034707	chloride channel complex	NA	NA	cellular_component	NA	0.0107848	NA	0	0	GABRG1;LOC105234775	2	0
GO:0005031	tumor necrosis factor-activated receptor activity	NA	NA	molecular_function	NA	0.000584755	NA	0	0	EDA2R	0	1
GO:0090276	regulation of peptide hormone secretion	NA	NA	biological_process	NA	0.000294308	NA	0	0	LOC100478332	0	1
GO:0032473	cytoplasmic side of mitochondrial outer membrane	NA	NA	cellular_component	NA	0	NA	0	0	LRRK2	1	0
GO:0048617	embryonic foregut morphogenesis	NA	NA	biological_process	NA	0.00265811	NA	0	0	SOX17	0	1
GO:0051537	2 iron, 2 sulfur cluster binding	NA	NA	molecular_function	NA	0.0183151	NA	0	0	FDX1L	1	0
GO:0042593	glucose homeostasis	CATARACT 41;Cataract;MUSCULAR DYSTROPHY, CONGENITAL, WITH CATARACTS AND INTELLECTUAL DISABILITY	0;WFS1;INPP5K	biological_process	NA	0.0239497	NA	0	0	LOC100478332;LOC100480531	0	2
GO:0032588	trans-Golgi network membrane	NA	NA	cellular_component	NA	0.0402917	NA	0	0	LOC100463889	1	0
GO:0044255	cellular lipid metabolic process	NA	NA	biological_process	NA	0.0486336	NA	0	0	DECR1;SLC25A20	2	0
GO:0032091	negative regulation of protein binding	PARTIAL LIPODYSTROPHY, CONGENITAL CATARACTS, AND NEURODEGENERATION SYNDROME	CAV1	biological_process	NA	0.0402917	NA	0	0	LRRK2	1	0
GO:0032182	ubiquitin-like protein binding	NA	NA	molecular_function	NA	0.000584755	NA	0	0	DCUN1D5	1	0
GO:0030276	clathrin binding	NA	NA	molecular_function	NA	0.0474116	NA	0	0	LRRK2	1	0
GO:0043005	neuron projection	Cataract, Nuclear Diffuse Nonprogressive;Cataract;MUSCULAR DYSTROPHY, CONGENITAL, WITH CATARACTS AND INTELLECTUAL DISABILITY	VIM;INPP5K	cellular_component	NA	0.0401843	NA	0	0	GABRG1;LRRK2;LOC105234775;SYP	3	1
GO:0090140	regulation of mitochondrial fission	NA	NA	biological_process	NA	0.000584755	NA	0	0	LRRK2	1	0
GO:0007262	STAT protein import into nucleus	NA	NA	biological_process	NA	0.000584755	NA	0	0	LOC105242099	1	0
GO:0006521	regulation of cellular amino acid metabolic process	NA	NA	biological_process	NA	0.0121736	NA	0	0	PSMD10	0	1
GO:0008508	bile acid:sodium symporter activity	NA	NA	molecular_function	NA	0.0014428	NA	0	0	SLC10A3	0	1
GO:0016241	regulation of macroautophagy	NA	NA	biological_process	NA	0.000968205	NA	0	0	UBQLN2	0	1
GO:0017075	syntaxin-1 binding	NA	NA	molecular_function	NA	0.00265811	NA	0	0	LRRK2	1	0
GO:0050811	GABA receptor binding	NA	NA	molecular_function	NA	0.000968205	NA	0	0	GABRG1	1	0
GO:0047751	cholestenone 5-alpha-reductase activity	NA	NA	molecular_function	NA	0.000294308	NA	0	0	SRD5A3	0	1
GO:0006953	acute-phase response	NA	NA	biological_process	NA	0.00113305	NA	0	0	LOC100468201;LOC100476613	1	1
GO:0004740	pyruvate dehydrogenase (acetyl-transferring) kinase activity	NA	NA	molecular_function	NA	0.000584755	NA	0	0	PDK1	1	0
GO:0005237	inhibitory extracellular ligand-gated ion channel activity	NA	NA	molecular_function	NA	1.9019e-05	NA	0	0	GABRG1;LOC105234775	2	0
GO:0004722	protein serine/threonine phosphatase activity	NA	NA	molecular_function	NA	0.0498797	NA	0	0	PDP1	1	0
GO:0030173	integral component of Golgi membrane	NA	NA	cellular_component	NA	0.0254952	NA	0	0	GFY	0	1
GO:0097452	GAIT complex	NA	NA	cellular_component	NA	0.00339525	NA	0	0	LOC100463747	1	0
GO:0016301	kinase activity	Cataract and cardiomyopathy;CATARACT 38;Cataract;CATARACT 6, MULTIPLE TYPES	ATM;EPHA2;GALK1;AGK	molecular_function	NA	0.00293651	NA	0	0	LRRK2;CDK5	1	1
GO:0045121	membrane raft	Cataract, Zonular Pulverulent 3;Cataract;Cryohydrocytosis, Stomatin-Deficient, with Mental Retardation, Seizures, Cataracts, and Massive Hepatosplenomegaly;PARTIAL LIPODYSTROPHY, CONGENITAL CATARACTS, AND NEURODEGENERATION SYNDROME	CAV1;ATP2B1;SLC2A1;GJA3	cellular_component	NA	0.0257649	NA	0	0	LRRK2;LOC100476759;GNAI1	3	0
GO:0048866	stem cell fate specification	NA	NA	biological_process	NA	0	NA	0	0	SOX17	0	1
GO:0010771	negative regulation of cell morphogenesis involved in differentiation	NA	NA	biological_process	NA	0.000294308	NA	0	0	LOC100466049	1	0
GO:0005545	1-phosphatidylinositol binding	NA	NA	molecular_function	NA	0.0136065	NA	0	0	EEA1	1	0
GO:0007416	synapse assembly	NA	NA	biological_process	NA	0.0402917	NA	0	0	CDK5	0	1
GO:0005761	mitochondrial ribosome	NA	NA	cellular_component	NA	0.0108116	NA	0	0	MRPL20	0	1
GO:0030510	regulation of BMP signaling pathway	NA	NA	biological_process	NA	0.000584755	NA	0	0	ACVR2A	1	0
GO:1903215	negative regulation of protein targeting to mitochondrion	Cataract	0	biological_process	NA	0.000294308	NA	0	0	LRRK2	1	0
GO:0045055	regulated secretory pathway	NA	NA	biological_process	NA	0.00421635	NA	0	0	CDK5	0	1
GO:0001816	cytokine production	Cataracts, Congenital, with Sensorineural Deafness, Down Syndrome-Like Facial Appearance, Short Stature, and Mental Retardation;Cataract, Pulverulent, Juvenile-Onset	MAF	biological_process	NA	0.00421635	NA	0	0	NFATC2IP	0	1
GO:0050661	NADP binding	NA	NA	molecular_function	NA	0.0336238	NA	0	0	LOC100463747	1	0
GO:2000484	positive regulation of interleukin-8 secretion	Cataract	0	biological_process	NA	0.000584755	NA	0	0	LOC100478332	0	1
GO:0008026	ATP-dependent helicase activity	NA	NA	molecular_function	NA	0.00421635	NA	0	0	DHX15	1	0
GO:0009611	response to wounding	NA	NA	biological_process	NA	0.0236078	NA	0	0	CDK5	0	1
GO:0003954	NADH dehydrogenase activity	NA	NA	molecular_function	NA	0.000294308	NA	0	0	NDUFA9	1	0
GO:0045648	positive regulation of erythrocyte differentiation	Cataract	0	biological_process	NA	0.00830639	NA	0	0	ACVR2A	1	0
GO:0048477	oogenesis	NA	NA	biological_process	NA	0.0217811	NA	0	0	ASPM	1	0
GO:0030666	endocytic vesicle membrane	PARTIAL LIPODYSTROPHY, CONGENITAL CATARACTS, AND NEURODEGENERATION SYNDROME	CAV1	cellular_component	NA	0.0294464	NA	0	0	LOC100463889	1	0
GO:0043235	receptor complex	NA	NA	cellular_component	NA	0.0429804	NA	0	0	GABRG1;ACVR2A	2	0
GO:0009301	snRNA transcription	NA	NA	biological_process	NA	0.000294308	NA	0	0	RPAP2	1	0
GO:0009566	fertilization	Cataract	0	biological_process	NA	0.0336238	NA	0	0	LOC105239870	0	1
GO:0015991	ATP hydrolysis coupled proton transport	NA	NA	biological_process	NA	0.0402917	NA	0	0	ATP6V1C1	1	0
GO:0045786	negative regulation of cell cycle	NA	NA	biological_process	NA	0.0294464	NA	0	0	CDK5	0	1
GO:0048388	endosomal lumen acidification	NA	NA	biological_process	NA	0	NA	0	0	AQP11	1	0
GO:0042713	sperm ejaculation	Cataract	0	biological_process	NA	9.87507e-05	NA	0	0	ACVR2A	1	0
GO:0019800	peptide cross-linking via chondroitin 4-sulfate glycosaminoglycan	NA	NA	biological_process	NA	0.0014428	NA	0	0	SPOCK3	1	0
GO:0031210	phosphatidylcholine binding	NA	NA	molecular_function	NA	0.00421635	NA	0	0	PCTP	0	1
GO:0005865	striated muscle thin filament	NA	NA	cellular_component	NA	0.0020067	NA	0	0	LMOD2	1	0
GO:0007202	activation of phospholipase C activity	NA	NA	biological_process	NA	0.0336238	NA	0	0	LOC100476759	1	0
GO:0009952	anterior/posterior pattern specification	NA	NA	biological_process	NA	0.00523434	NA	0	0	ACVR2A;HOXC6;LOC105239870	1	2
GO:0045116	protein neddylation	NA	NA	biological_process	NA	0.00610362	NA	0	0	DCUN1D5	1	0
GO:0061418	regulation of transcription from RNA polymerase II promoter in response to hypoxia	NA	NA	biological_process	NA	0.00339525	NA	0	0	EGLN3	1	0
GO:0005254	chloride channel activity	NA	NA	molecular_function	NA	0.0121121	NA	0	0	GABRG1;LOC105234775	2	0
GO:0008574	ATP-dependent microtubule motor activity, plus-end-directed	NA	NA	molecular_function	NA	0.00952199	NA	0	0	KIF20B	1	0
GO:0016533	cyclin-dependent protein kinase 5 holoenzyme complex	NA	NA	cellular_component	NA	0.000294308	NA	0	0	CDK5	0	1
GO:0002720	positive regulation of cytokine production involved in immune response	NA	NA	biological_process	NA	0.000294308	NA	0	0	LOC100478332	0	1
GO:0008631	intrinsic apoptotic signaling pathway in response to oxidative stress	Cataract and cardiomyopathy	SOD2	biological_process	NA	0.00265811	NA	0	0	PDK1	1	0
GO:0033136	serine phosphorylation of STAT3 protein	NA	NA	biological_process	NA	0.000294308	NA	0	0	CDK5	0	1
GO:0071158	positive regulation of cell cycle arrest	Cataract	0	biological_process	NA	0.00610362	NA	0	0	RGCC	1	0
GO:0004322	ferroxidase activity	Cataract	0	molecular_function	NA	0.00339525	NA	0	0	HEPHL1	1	0
GO:0001948	glycoprotein binding	NA	NA	molecular_function	NA	0.0236078	NA	0	0	LRRK2	1	0
GO:2000573	positive regulation of DNA biosynthetic process	Cataract;Myopathy, Mitochondrial Progressive, With Congenital Cataract, Hearing Loss, And Developmental Delay	0;GFER	biological_process	NA	0.0014428	NA	0	0	RGCC	1	0
GO:0006977	DNA damage response, signal transduction by p53 class mediator resulting in cell cycle arrest	Cataract	ATM	biological_process	NA	0.0274418	NA	0	0	PSMD10	0	1
GO:0048208	COPII vesicle coating	NA	NA	biological_process	NA	0.00339525	NA	0	0	KLHL12	1	0
GO:0006096	glycolytic process	Cataract	0	biological_process	NA	0.0315075	NA	0	0	LOC100463747	1	0
GO:0031624	ubiquitin conjugating enzyme binding	NA	NA	molecular_function	NA	0.0121736	NA	0	0	DCUN1D5	1	0
GO:0021987	cerebral cortex development	Cryohydrocytosis, Stomatin-Deficient, with Mental Retardation, Seizures, Cataracts, and Massive Hepatosplenomegaly	SLC2A1	biological_process	NA	0.00323913	NA	0	0	CDK5;ASPM	1	1
GO:0071723	lipopeptide binding	NA	NA	molecular_function	NA	0.00511971	NA	0	0	LOC109488338	1	0
GO:0051900	regulation of mitochondrial depolarization	NA	NA	biological_process	NA	0.000294308	NA	0	0	LRRK2	1	0
GO:0035606	peptidyl-cysteine S-trans-nitrosylation	NA	NA	biological_process	NA	0.0014428	NA	0	0	LOC100463747	1	0
GO:0060173	limb development	NA	NA	biological_process	NA	0.0183151	NA	0	0	LOC105239870	0	1
GO:1900186	negative regulation of clathrin-mediated endocytosis	NA	NA	biological_process	NA	9.87507e-05	NA	0	0	UBQLN2	0	1
GO:0060849	regulation of transcription involved in lymphatic endothelial cell fate commitment	NA	NA	biological_process	NA	0.000294308	NA	0	0	LOC105239870	0	1
GO:1904021	negative regulation of G-protein coupled receptor internalization	NA	NA	biological_process	NA	0	NA	0	0	UBQLN2	0	1
GO:0002244	hematopoietic progenitor cell differentiation	CATARACT 45	SIPA1L3	biological_process	NA	0.0183257	NA	0	0	PYGO1;HEATR9	1	1
GO:0009100	glycoprotein metabolic process	NA	NA	biological_process	NA	9.87507e-05	NA	0	0	ERP44	1	0
GO:0048168	regulation of neuronal synaptic plasticity	NA	NA	biological_process	NA	0.00339525	NA	0	0	SYP	0	1
GO:0005516	calmodulin binding	CATARACT 41;Cataract;CATARACT 15, MULTIPLE TYPES	ATP2B1;MIP;WFS1	molecular_function	NA	0.00895994	NA	0	0	EEA1;MIP	2	0
GO:0070034	telomeric RNA binding	NA	NA	molecular_function	NA	9.87507e-05	NA	0	0	PINX1	1	0
GO:2000469	negative regulation of peroxidase activity	Cataract	0	biological_process	NA	0	NA	0	0	LRRK2	1	0
GO:0097431	mitotic spindle pole	NA	NA	cellular_component	NA	3.30394e-05	NA	0	0	KIF20B;ASPM	2	0
GO:0050714	positive regulation of protein secretion	NA	NA	biological_process	NA	0.0217811	NA	0	0	LOC100480531	0	1
GO:0048484	enteric nervous system development	NA	NA	biological_process	NA	0.00339525	NA	0	0	TLX2	0	1
GO:0001963	synaptic transmission, dopaminergic	NA	NA	biological_process	NA	0.0014428	NA	0	0	CDK5	0	1
GO:0010951	negative regulation of endopeptidase activity	NA	NA	biological_process	NA	0.0107848	NA	0	0	SPOCK3;SERPINB11	2	0
GO:0060161	positive regulation of dopamine receptor signaling pathway	NA	NA	biological_process	NA	0.000294308	NA	0	0	LRRK2	1	0
GO:0030016	myofibril	NA	NA	cellular_component	NA	0.0357942	NA	0	0	LMOD2	1	0
GO:0007253	cytoplasmic sequestering of NF-kappaB	NA	NA	biological_process	NA	0.000968205	NA	0	0	PSMD10	0	1
GO:0032729	positive regulation of interferon-gamma production	NA	NA	biological_process	NA	0.0254952	NA	0	0	LOC100463889	1	0
GO:0016126	sterol biosynthetic process	MICROCEPHALY, CONGENITAL CATARACT, AND PSORIASIFORM DERMATITIS	MSMO1	biological_process	NA	0.00265811	NA	0	0	MSMO1	0	1
GO:0000375	RNA splicing, via transesterification reactions	NA	NA	biological_process	NA	0.00952199	NA	0	0	WDR83	0	1
GO:0002479	antigen processing and presentation of exogenous peptide antigen via MHC class I, TAP-dependent	NA	NA	biological_process	NA	0.0183151	NA	0	0	PSMD10	0	1
GO:0005215	transporter activity	Cryohydrocytosis, Stomatin-Deficient, with Mental Retardation, Seizures, Cataracts, and Massive Hepatosplenomegaly	SLC2A1	molecular_function	NA	0.0129989	NA	0	0	AQP11;SYP;LOC109489683	2	1
GO:0002232	leukocyte chemotaxis involved in inflammatory response	NA	NA	biological_process	NA	0.000968205	NA	0	0	LOC100478332	0	1
GO:0038061	NIK/NF-kappaB signaling	NA	NA	biological_process	NA	0.0151087	NA	0	0	PSMD10	0	1
GO:0043518	negative regulation of DNA damage response, signal transduction by p53 class mediator	NA	NA	biological_process	NA	0.000584755	NA	0	0	PSMD10	0	1
GO:0007493	endodermal cell fate determination	NA	NA	biological_process	NA	0	NA	0	0	SOX17	0	1
GO:0014041	regulation of neuron maturation	NA	NA	biological_process	NA	9.87507e-05	NA	0	0	LRRK2	1	0
GO:0000254	C-4 methylsterol oxidase activity	MICROCEPHALY, CONGENITAL CATARACT, AND PSORIASIFORM DERMATITIS	MSMO1	molecular_function	NA	0	NA	0	0	MSMO1	0	1
GO:0043406	positive regulation of MAP kinase activity	NA	NA	biological_process	NA	0.0254952	NA	0	0	LRRK2	1	0
GO:0021954	central nervous system neuron development	NA	NA	biological_process	NA	0.0020067	NA	0	0	CDK5	0	1
GO:1902499	positive regulation of protein autoubiquitination	NA	NA	biological_process	NA	9.87507e-05	NA	0	0	LRRK2	1	0
GO:0019915	lipid storage	PARTIAL LIPODYSTROPHY, CONGENITAL CATARACTS, AND NEURODEGENERATION SYNDROME	CAV1	biological_process	NA	0.0166787	NA	0	0	LOC100478332	0	1
GO:0051496	positive regulation of stress fiber assembly	NA	NA	biological_process	NA	0.0380172	NA	0	0	RGCC	1	0
GO:0051059	NF-kappaB binding	Cataract	0	molecular_function	NA	0.00830639	NA	0	0	LOC100483636	1	0
GO:0031545	peptidyl-proline 4-dioxygenase activity	NA	NA	molecular_function	NA	9.87507e-05	NA	0	0	EGLN3	1	0
GO:0048312	intracellular distribution of mitochondria	NA	NA	biological_process	NA	0.000968205	NA	0	0	LRRK2	1	0
GO:0043084	penile erection	NA	NA	biological_process	NA	9.87507e-05	NA	0	0	ACVR2A	1	0
GO:0090306	spindle assembly involved in meiosis	NA	NA	biological_process	NA	0.000294308	NA	0	0	ASPM	1	0
GO:0045736	negative regulation of cyclin-dependent protein serine/threonine kinase activity	NA	NA	biological_process	NA	0.00830639	NA	0	0	LOC105239870	0	1
GO:0015966	diadenosine tetraphosphate biosynthetic process	NA	NA	biological_process	NA	9.87507e-05	NA	0	0	GARS	1	0
GO:0034260	negative regulation of GTPase activity	NA	NA	biological_process	NA	0.0151087	NA	0	0	LRRK2	1	0
GO:0031659	positive regulation of cyclin-dependent protein serine/threonine kinase activity involved in G1/S transition of mitotic cell cycle	NA	NA	biological_process	NA	0.000294308	NA	0	0	RGCC	1	0
GO:0030216	keratinocyte differentiation	CATARACT 6, MULTIPLE TYPES	EPHA2	biological_process	NA	0.0294464	NA	0	0	CASP3	1	0
GO:0030521	androgen receptor signaling pathway	NA	NA	biological_process	NA	0.0151087	NA	0	0	MED17	1	0
GO:0051091	positive regulation of sequence-specific DNA binding transcription factor activity	Cataract	0	biological_process	NA	0.00401601	NA	0	0	PPRC1;LOC100483636;RGCC	3	0
GO:0004890	GABA-A receptor activity	NA	NA	molecular_function	NA	0.000494847	NA	0	0	GABRG1;LOC105234775	2	0
GO:0006633	fatty acid biosynthetic process	Cataract	0	biological_process	NA	0.0474116	NA	0	0	MSMO1	0	1
GO:0030308	negative regulation of cell growth	CATARACT 16, MULTIPLE TYPES;Cataract	CRYAB	biological_process	NA	0.0376798	NA	0	0	SOX17;SCGB3A1	1	1
GO:0015969	guanosine tetraphosphate metabolic process	NA	NA	biological_process	NA	0	NA	0	0	HDDC3	0	1
GO:0051018	protein kinase A binding	NA	NA	molecular_function	NA	0.00716639	NA	0	0	LRRK2	1	0
GO:0044291	cell-cell contact zone	HEMORRHAGIC DESTRUCTION OF THE BRAIN, SUBEPENDYMAL CALCIFICATION, AND CATARACTS	JAM3	cellular_component	NA	0.00421635	NA	0	0	OPALIN	1	0
GO:0060842	arterial endothelial cell differentiation	NA	NA	biological_process	NA	0.000294308	NA	0	0	TMEM100	1	0
GO:0046826	negative regulation of protein export from nucleus	NA	NA	biological_process	NA	0.0020067	NA	0	0	CDK5	0	1
GO:0004364	glutathione transferase activity	Cataract	0	molecular_function	NA	0.0200164	NA	0	0	GSTM3	1	0
GO:0008035	high-density lipoprotein particle binding	NA	NA	molecular_function	NA	0.000584755	NA	0	0	LOC100476613	0	1
GO:0002879	positive regulation of acute inflammatory response to non-antigenic stimulus	NA	NA	biological_process	NA	0.000294308	NA	0	0	LOC100478332	0	1
GO:0008420	CTD phosphatase activity	Congenital Cataracts, Facial Dysmorphism, And Neuropathy	CTDP1	molecular_function	NA	0.00265811	NA	0	0	RPAP2	1	0
GO:0006357	regulation of transcription from RNA polymerase II promoter	Cataract and cardiomyopathy	SOD2	biological_process	0.102049	0.0211694	SOX9;NKX2-5	1	1	TLX2;MED23;LOC105239870;MED17;ABT1;NKX2-5	4	2
GO:0050699	WW domain binding	NA	NA	molecular_function	NA	0.0217811	NA	0	0	KIF20B	1	0
GO:0048488	synaptic vesicle endocytosis	NA	NA	biological_process	NA	0.0200164	NA	0	0	CDK5	0	1
GO:0046676	negative regulation of insulin secretion	Cataract	0	biological_process	NA	0.0183151	NA	0	0	LOC100480531	0	1
GO:1990716	axonemal central apparatus	NA	NA	cellular_component	NA	0.000294308	NA	0	0	SPAG16	1	0
GO:0010510	regulation of acetyl-CoA biosynthetic process from pyruvate	NA	NA	biological_process	NA	0.000151247	NA	0	0	PDP1;PDK1	2	0
GO:0004672	protein kinase activity	Cataract;CATARACT 6, MULTIPLE TYPES	ATM;EPHA2	molecular_function	0.0802853	0.0288208	SOX9	0	1	LRRK2;PDK1;CDK5	2	1
GO:0060674	placenta blood vessel development	NA	NA	biological_process	NA	0.000584755	NA	0	0	LOC105239870	0	1
GO:0005765	lysosomal membrane	NA	NA	cellular_component	NA	0.015835	NA	0	0	ATP6V1C1;LOC100463889;OSTM1;GNAI1;LMBRD1	5	0
GO:0008336	gamma-butyrobetaine dioxygenase activity	NA	NA	molecular_function	NA	9.87507e-05	NA	0	0	BBOX1	1	0
GO:1902236	negative regulation of endoplasmic reticulum stress-induced intrinsic apoptotic signaling pathway	CATARACT 41	WFS1	biological_process	NA	0.00716639	NA	0	0	LRRK2	1	0
GO:0000447	endonucleolytic cleavage in ITS1 to separate SSU-rRNA from 5.8S rRNA and LSU-rRNA from tricistronic rRNA transcript (SSU-rRNA, 5.8S rRNA, LSU-rRNA)	NA	NA	biological_process	NA	0.000968205	NA	0	0	ABT1	1	0
GO:0006488	dolichol-linked oligosaccharide biosynthetic process	NA	NA	biological_process	NA	0.0121736	NA	0	0	SRD5A3	0	1
GO:0019897	extrinsic component of plasma membrane	NA	NA	cellular_component	NA	0.00952199	NA	0	0	EEA1	1	0
GO:0030496	midbody	Cryohydrocytosis, Stomatin-Deficient, with Mental Retardation, Seizures, Cataracts, and Massive Hepatosplenomegaly;Congenital Cataracts, Facial Dysmorphism, And Neuropathy;Cataract, posterior polar, 3	CTDP1;CHMP4B;SLC2A1	cellular_component	NA	0.0250329	NA	0	0	KIF20B;GNAI1;ASPM	3	0
GO:0015631	tubulin binding	NA	NA	molecular_function	NA	0.0236078	NA	0	0	LRRK2	1	0
GO:0005730	nucleolus	Cataract	ATM;ERCC6	cellular_component	0.26913	0.029527	FRG1;PNO1;LOC100472465	1	2	TRA2A;TOP2B;TRIM68;NONO;RPAP2;PINX1;ABT1;KIF20B;MPHOSPH6;BRIX1;DHX15	10	1
GO:0002385	mucosal immune response	NA	NA	biological_process	NA	0.000968205	NA	0	0	LOC100478332	0	1
GO:0070938	contractile ring	NA	NA	cellular_component	NA	0.000968205	NA	0	0	KIF20B	1	0
GO:0043113	receptor clustering	NA	NA	biological_process	NA	0.0136065	NA	0	0	CDK5	0	1
GO:0002223	stimulatory C-type lectin receptor signaling pathway	NA	NA	biological_process	NA	0.0357942	NA	0	0	PSMD10	0	1
GO:0045665	negative regulation of neuron differentiation	PARTIAL LIPODYSTROPHY, CONGENITAL CATARACTS, AND NEURODEGENERATION SYNDROME	CAV1	biological_process	NA	0.00733058	NA	0	0	LOC100466049;ASPM	2	0
GO:0006913	nucleocytoplasmic transport	NA	NA	biological_process	NA	0.0121736	NA	0	0	CDK5	0	1
GO:0010906	regulation of glucose metabolic process	Cataract	0	biological_process	NA	0.00830639	NA	0	0	PDK1	1	0
GO:0034462	small-subunit processome assembly	NA	NA	biological_process	NA	0	NA	0	0	ABT1	1	0
GO:2000048	negative regulation of cell-cell adhesion mediated by cadherin	NA	NA	biological_process	NA	0	NA	0	0	RGCC	1	0
GO:0018126	protein hydroxylation	NA	NA	biological_process	NA	9.87507e-05	NA	0	0	EGLN3	1	0
GO:1901215	negative regulation of neuron death	Cataract, posterior polar, 3	CHMP4B	biological_process	NA	0.000151247	NA	0	0	LRRK2;CDK5	1	1
GO:0017048	Rho GTPase binding	NA	NA	molecular_function	NA	0.00610362	NA	0	0	LRRK2	1	0
GO:0045861	negative regulation of proteolysis	NA	NA	biological_process	NA	0.00421635	NA	0	0	CDK5	0	1
GO:0023019	signal transduction involved in regulation of gene expression	NA	NA	biological_process	NA	0.00511971	NA	0	0	SOX17	0	1
GO:0016592	mediator complex	NA	NA	cellular_component	NA	0.00390003	NA	0	0	MED23;MED17	2	0
GO:0031398	positive regulation of protein ubiquitination	CATARACT 41;Cataract;PARTIAL LIPODYSTROPHY, CONGENITAL CATARACTS, AND NEURODEGENERATION SYNDROME	CAV1;0;WFS1	biological_process	NA	0.00425897	NA	0	0	PSMD10;LRRK2	1	1
GO:0060807	regulation of transcription from RNA polymerase II promoter involved in definitive endodermal cell fate specification	NA	NA	biological_process	NA	0	NA	0	0	SOX17	0	1
GO:0071817	MMXD complex	NA	NA	cellular_component	NA	0.000584755	NA	0	0	FAM96B	1	0
GO:0052829	inositol-1,3,4-trisphosphate 1-phosphatase activity	NA	NA	molecular_function	NA	0	NA	0	0	INPP1	0	1
GO:0005685	U1 snRNP	NA	NA	cellular_component	NA	0.0200164	NA	0	0	LUC7L3	1	0
GO:0071346	cellular response to interferon-gamma	Cataract, Nuclear Diffuse Nonprogressive;Cataract	VIM	biological_process	NA	0.0274418	NA	0	0	LOC100463889	1	0
GO:0031419	cobalamin binding	NA	NA	molecular_function	NA	0.000110808	NA	0	0	MUT;LMBRD1	1	1
GO:0001893	maternal placenta development	NA	NA	biological_process	NA	0.00265811	NA	0	0	LOC105239870	0	1
GO:0071850	mitotic cell cycle arrest	Cataract	0	biological_process	NA	7.81376e-05	NA	0	0	GADD45GIP1;RGCC	1	1
GO:0016746	transferase activity, transferring acyl groups	NA	NA	molecular_function	NA	0.00716639	NA	0	0	ESCO1	1	0
GO:0000027	ribosomal large subunit assembly	NA	NA	biological_process	NA	0.000494847	NA	0	0	MRPL20;BRIX1	1	1
GO:0018401	peptidyl-proline hydroxylation to 4-hydroxy-L-proline	NA	NA	biological_process	NA	0.000584755	NA	0	0	EGLN3	1	0
GO:0022028	tangential migration from the subventricular zone to the olfactory bulb	NA	NA	biological_process	NA	0.000584755	NA	0	0	LRRK2	1	0
GO:0001106	RNA polymerase II transcription corepressor activity	NA	NA	molecular_function	NA	0.0166787	NA	0	0	N4BP2L2	1	0
GO:0005759	mitochondrial matrix	Cataract and cardiomyopathy;CATARACT 36;Cataract;CATARACTS, GROWTH HORMONE DEFICIENCY, SENSORY NEUROPATHY, SENSORINEURAL HEARING LOSS, AND SKELETAL DYSPLASIA	TDRD7;SOD2;IARS2	cellular_component	NA	3.68158e-05	NA	0	0	NDUFA9;GADD45GIP1;FDX1L;DECR1;LRRK2;IBA57;PDP1;PDK1;MUT	6	3
GO:0034673	inhibin-betaglycan-ActRII complex	NA	NA	cellular_component	NA	0	NA	0	0	ACVR2A	1	0
GO:0030517	negative regulation of axon extension	NA	NA	biological_process	NA	0.00265811	NA	0	0	CDK5	0	1
GO:0032927	positive regulation of activin receptor signaling pathway	NA	NA	biological_process	NA	0.0014428	NA	0	0	ACVR2A	1	0
GO:1903206	negative regulation of hydrogen peroxide-induced cell death	NA	NA	biological_process	NA	0.00265811	NA	0	0	LRRK2	1	0
GO:0050715	positive regulation of cytokine secretion	Cataract	0	biological_process	NA	0.00830639	NA	0	0	RGCC	1	0
GO:0046039	GTP metabolic process	NA	NA	biological_process	NA	0.0014428	NA	0	0	LRRK2	1	0
GO:0032722	positive regulation of chemokine production	NA	NA	biological_process	NA	0.00421635	NA	0	0	LOC100478332	0	1
GO:0051603	proteolysis involved in cellular protein catabolic process	NA	NA	biological_process	NA	0.0121736	NA	0	0	LOC100484313	1	0
GO:0015721	bile acid and bile salt transport	NA	NA	biological_process	NA	0.0108116	NA	0	0	SLC10A3	0	1
GO:0017080	sodium channel regulator activity	NA	NA	molecular_function	NA	0.0121736	NA	0	0	FXYD7	0	1
GO:0005921	gap junction	Cataract, Zonular Pulverulent 1;Cataract, Zonular Pulverulent 3;Cataract;Cataract microcornea syndrome;CATARACT 15, MULTIPLE TYPES	MIP;GJA3;GJA8	cellular_component	NA	0.00830639	NA	0	0	MIP	1	0
GO:0035970	peptidyl-threonine dephosphorylation	NA	NA	biological_process	NA	0.0014428	NA	0	0	PDP1	1	0
GO:0070585	protein localization to mitochondrion	NA	NA	biological_process	NA	0.000584755	NA	0	0	LRRK2	1	0
GO:0045095	keratin filament	NA	NA	cellular_component	NA	0.0142715	NA	0	0	LOC100480853;LOC100478351	1	1
GO:0010738	regulation of protein kinase A signaling	NA	NA	biological_process	NA	0.00421635	NA	0	0	LRRK2	1	0
GO:0001828	inner cell mass cellular morphogenesis	NA	NA	biological_process	NA	0	NA	0	0	SOX17	0	1
GO:0021772	olfactory bulb development	NA	NA	biological_process	NA	0.00952199	NA	0	0	LRRK2	1	0
GO:0021537	telencephalon development	NA	NA	biological_process	NA	0.00610362	NA	0	0	CDK5	0	1
GO:0006956	complement activation	Cataract	0	biological_process	NA	0.000584755	NA	0	0	RGCC	1	0
GO:0050774	negative regulation of dendrite morphogenesis	NA	NA	biological_process	NA	0.0014428	NA	0	0	TLX2	0	1
GO:0017002	activin-activated receptor activity	NA	NA	molecular_function	NA	0	NA	0	0	ACVR2A	1	0
GO:0048706	embryonic skeletal system development	NA	NA	biological_process	NA	0.00238514	NA	0	0	ACVR2A;HOXC6	1	1
GO:0005637	nuclear inner membrane	CATARACT 46, JUVENILE-ONSET	LEMD2	cellular_component	NA	0.0380172	NA	0	0	FAM169A	1	0
GO:0042645	mitochondrial nucleoid	Cataract and cardiomyopathy	SOD2	cellular_component	NA	0.0449901	NA	0	0	TFB2M	1	0
GO:0051661	maintenance of centrosome location	NA	NA	biological_process	NA	9.87507e-05	NA	0	0	ASPM	1	0
GO:0001707	mesoderm formation	NA	NA	biological_process	NA	0.0108116	NA	0	0	TLX2	0	1
GO:0030672	synaptic vesicle membrane	NA	NA	cellular_component	NA	0.0128094	NA	0	0	LRRK2;SYP	1	1
GO:0033180	proton-transporting V-type ATPase, V1 domain	NA	NA	cellular_component	NA	0.00265811	NA	0	0	ATP6V1C1	1	0
GO:0045840	positive regulation of mitotic nuclear division	Cataract	0	biological_process	NA	0.00610362	NA	0	0	RGCC	1	0
GO:0000179	rRNA (adenine-N6,N6-)-dimethyltransferase activity	NA	NA	molecular_function	NA	0.000584755	NA	0	0	TFB2M	1	0
GO:0007188	adenylate cyclase-modulating G-protein coupled receptor signaling pathway	NA	NA	biological_process	NA	0.0380172	NA	0	0	GNAI1	1	0
GO:1902803	regulation of synaptic vesicle transport	NA	NA	biological_process	NA	9.87507e-05	NA	0	0	LRRK2	1	0
GO:0007498	mesoderm development	NA	NA	biological_process	NA	0.0136065	NA	0	0	ACVR2A	1	0
GO:0030881	beta-2-microglobulin binding	NA	NA	molecular_function	NA	0.00830639	NA	0	0	LOC109488338	1	0
GO:0048148	behavioral response to cocaine	Cataract	0	biological_process	NA	0.0014428	NA	0	0	CDK5	0	1
GO:0010508	positive regulation of autophagy	Cataract	0	biological_process	NA	0.0274418	NA	0	0	LRRK2	1	0
GO:0015250	water channel activity	Cataract;CATARACT 15, MULTIPLE TYPES	MIP	molecular_function	NA	0.00339525	NA	0	0	MIP	1	0
GO:0006906	vesicle fusion	NA	NA	biological_process	NA	0.0200164	NA	0	0	EEA1	1	0
GO:1902692	regulation of neuroblast proliferation	NA	NA	biological_process	NA	9.87507e-05	NA	0	0	LRRK2	1	0
GO:0030658	transport vesicle membrane	NA	NA	cellular_component	NA	0.0380172	NA	0	0	LOC100463889	1	0
GO:0010955	negative regulation of protein processing	NA	NA	biological_process	NA	0.00265811	NA	0	0	LRRK2	1	0
GO:0032355	response to estradiol	Cataract, Nuclear Diffuse Nonprogressive;CATARACT 16, MULTIPLE TYPES;Cataract	CRYAB;VIM	biological_process	NA	0.0474116	NA	0	0	LOC105239870	0	1
GO:0045597	positive regulation of cell differentiation	Cataract, zonular;Cataract	HSF4;0	biological_process	NA	0.0183151	NA	0	0	SOX17	0	1
GO:0022038	corpus callosum development	Cataract	0	biological_process	NA	0.000968205	NA	0	0	CDK5	0	1
GO:0051646	mitochondrion localization	Cataract	0	biological_process	NA	0.0014428	NA	0	0	LRRK2	1	0
GO:0008045	motor neuron axon guidance	NA	NA	biological_process	NA	0.00830639	NA	0	0	CDK5	0	1
GO:0019722	calcium-mediated signaling	Cataract	0	biological_process	NA	0.0474116	NA	0	0	LRRK2	1	0
GO:0035641	locomotory exploration behavior	Cataract	0	biological_process	NA	0.00339525	NA	0	0	LRRK2	1	0
GO:1903351	cellular response to dopamine	NA	NA	biological_process	NA	9.87507e-05	NA	0	0	LRRK2	1	0
GO:0090394	negative regulation of excitatory postsynaptic potential	Cataract	0	biological_process	NA	0.0020067	NA	0	0	LRRK2	1	0
GO:0005967	mitochondrial pyruvate dehydrogenase complex	NA	NA	cellular_component	NA	0.000294308	NA	0	0	PDK1	1	0
GO:0048167	regulation of synaptic plasticity	Cataract	0	biological_process	NA	0.0200164	NA	0	0	CDK5	0	1
GO:0050663	cytokine secretion	NA	NA	biological_process	NA	0.00265811	NA	0	0	LOC100476759	1	0
GO:0030742	GTP-dependent protein binding	NA	NA	molecular_function	NA	0.0020067	NA	0	0	EEA1	1	0
GO:0030549	acetylcholine receptor activator activity	NA	NA	molecular_function	NA	0	NA	0	0	CDK5	0	1
GO:0030134	ER to Golgi transport vesicle	NA	NA	cellular_component	NA	0.00265811	NA	0	0	KLHL12	1	0
GO:0030182	neuron differentiation	Cataract;CATARACT 6, MULTIPLE TYPES	EPHA2;0	biological_process	NA	0.0443609	NA	0	0	CASP3;CDK5	1	1
GO:2001214	positive regulation of vasculogenesis	Cataract	0	biological_process	NA	0.00265811	NA	0	0	TMEM100	1	0
GO:0043409	negative regulation of MAPK cascade	PARTIAL LIPODYSTROPHY, CONGENITAL CATARACTS, AND NEURODEGENERATION SYNDROME;CATARACT 46, JUVENILE-ONSET	CAV1;LEMD2	biological_process	NA	0.0014428	NA	0	0	PSMD10	0	1
GO:1903071	positive regulation of ER-associated ubiquitin-dependent protein catabolic process	PARTIAL LIPODYSTROPHY, CONGENITAL CATARACTS, AND NEURODEGENERATION SYNDROME	CAV1	biological_process	NA	0.00339525	NA	0	0	UBQLN2	0	1
GO:0051233	spindle midzone	Congenital Cataracts, Facial Dysmorphism, And Neuropathy	CTDP1	cellular_component	NA	0.0108116	NA	0	0	KIF20B	1	0
GO:0000480	endonucleolytic cleavage in 5'-ETS of tricistronic rRNA transcript (SSU-rRNA, 5.8S rRNA, LSU-rRNA)	NA	NA	biological_process	NA	0.000294308	NA	0	0	ABT1	1	0
GO:0031683	G-protein beta/gamma-subunit complex binding	NA	NA	molecular_function	NA	0.0151087	NA	0	0	GNAI1	1	0
GO:0005762	mitochondrial large ribosomal subunit	NA	NA	cellular_component	NA	0.0336238	NA	0	0	MRPL20	0	1
GO:0016706	oxidoreductase activity, acting on paired donors, with incorporation or reduction of molecular oxygen, 2-oxoglutarate as one donor, and incorporation of one atom each of oxygen into both donors	NA	NA	molecular_function	NA	0.00830639	NA	0	0	EGLN3	1	0
GO:0004702	receptor signaling protein serine/threonine kinase activity	NA	NA	molecular_function	NA	0.00511971	NA	0	0	ACVR2A	1	0
GO:1901741	positive regulation of myoblast fusion	Cataract	0	biological_process	NA	0.00511971	NA	0	0	SCGB3A1	1	0
GO:0042613	MHC class II protein complex	NA	NA	cellular_component	NA	0.00830639	NA	0	0	LOC100463889	1	0
GO:0071556	integral component of lumenal side of endoplasmic reticulum membrane	NA	NA	cellular_component	NA	0.00610362	NA	0	0	LOC100463889	1	0
GO:0006749	glutathione metabolic process	Cataract and cardiomyopathy;Cataract	0;SOD2	biological_process	NA	0.0294464	NA	0	0	GSTM3	1	0
GO:0048514	blood vessel morphogenesis	CATARACT 6, MULTIPLE TYPES	EPHA2	biological_process	NA	0.00610362	NA	0	0	LOC105239870	0	1
GO:0021903	rostrocaudal neural tube patterning	NA	NA	biological_process	NA	0.000294308	NA	0	0	SOX17	0	1
GO:0072332	intrinsic apoptotic signaling pathway by p53 class mediator	NA	NA	biological_process	NA	0.0136065	NA	0	0	EDA2R	0	1
GO:0005212	structural constituent of eye lens	Cataract, Autosomal Dominant, Multiple Types 1;CATARACT 20, MULTIPLE TYPES;CATARACT 16, MULTIPLE TYPES;CATARACT 15, MULTIPLE TYPES;CATARACT 23, MULTIPLE TYPES;Cataract, Nuclear Diffuse Nonprogressive;CATARACT 39, MULTIPLE TYPES;CATARACT 42;Cataract, Congenital Zonular, with Sutural Opacities;Cataract, Coppock-Like;CATARACT 3, MULTIPLE TYPES;Cataract, Autosomal Dominant;Cataract, Congenital Nuclea…	CRYAA;CRYGB;CRYBA4;CRYBA1;BFSP2;MIP;CRYBB1;CRYGC;CRYBB3;VIM;BFSP1;CRYBB2;CRYGF;CRYGD;CRYAB;LIM2;CRYBA2;CRYGS	molecular_function	NA	0.0183151	NA	0	0	MIP	1	0
GO:0000166	nucleotide binding	Cataract and cardiomyopathy;CATARACT 38;Cataract;3-METHYLGLUTACONIC ACIDURIA WITH CATARACTS, NEUROLOGIC INVOLVEMENT, AND NEUTROPENIA;CATARACTS, GROWTH HORMONE DEFICIENCY, SENSORY NEUROPATHY, SENSORINEURAL HEARING LOSS, AND SKELETAL DYSPLASIA;CATARACT 6, MULTIPLE TYPES	ATM;ATP2B1;EPHA2;GALK1;CLPB;AGK;IARS2	molecular_function	NA	0.0190355	NA	0	0	TRA2A;LOC100483526;PPRC1;RBM46;NONO;ABT1	3	3
GO:0060079	excitatory postsynaptic potential	NA	NA	biological_process	NA	0.000710583	NA	0	0	LRRK2;CDK5	1	1
GO:0042391	regulation of membrane potential	Cataract	0	biological_process	NA	0.0129989	NA	0	0	GABRG1;LRRK2;LOC105234775	3	0
GO:1903438	positive regulation of mitotic cytokinetic process	NA	NA	biological_process	NA	0	NA	0	0	KIF20B	1	0
GO:0048813	dendrite morphogenesis	NA	NA	biological_process	NA	0.0449901	NA	0	0	CDK5	0	1
GO:0050321	tau-protein kinase activity	NA	NA	molecular_function	NA	0.00421635	NA	0	0	CDK5	0	1
GO:0035418	protein localization to synapse	NA	NA	biological_process	NA	0.00421635	NA	0	0	CDK5	0	1
GO:0031410	cytoplasmic vesicle	Cataract;Cataract, autosomal recessive congenital 2;PARTIAL LIPODYSTROPHY, CONGENITAL CATARACTS, AND NEURODEGENERATION SYNDROME	CAV1;FYCO1;ATM	cellular_component	NA	0.0243137	NA	0	0	LRRK2;EEA1;UBQLN2	2	1
GO:0016628	oxidoreductase activity, acting on the CH-CH group of donors, NAD or NADP as acceptor	NA	NA	molecular_function	NA	0.000294308	NA	0	0	SRD5A3	0	1
GO:0030669	clathrin-coated endocytic vesicle membrane	NA	NA	cellular_component	NA	0.00716639	NA	0	0	LOC100463889	1	0
GO:0031914	negative regulation of synaptic plasticity	NA	NA	biological_process	NA	9.87507e-05	NA	0	0	CDK5	0	1
GO:0006270	DNA replication initiation	NA	NA	biological_process	NA	0.00610362	NA	0	0	GMNC	1	0
GO:0046855	inositol phosphate dephosphorylation	MUSCULAR DYSTROPHY, CONGENITAL, WITH CATARACTS AND INTELLECTUAL DISABILITY	INPP5K	biological_process	NA	0.00265811	NA	0	0	INPP1	0	1
GO:1901214	regulation of neuron death	Cataract	0	biological_process	NA	0.00610362	NA	0	0	LRRK2	1	0
GO:0031594	neuromuscular junction	NA	NA	cellular_component	NA	0.0402917	NA	0	0	CDK5	0	1
GO:0055087	Ski complex	NA	NA	cellular_component	NA	0.000294308	NA	0	0	TTC37	1	0
GO:0019348	dolichol metabolic process	NA	NA	biological_process	NA	0.000294308	NA	0	0	SRD5A3	0	1
GO:0035372	protein localization to microtubule	NA	NA	biological_process	NA	0.0014428	NA	0	0	KIF20B	1	0
GO:0005969	serine-pyruvate aminotransferase complex	NA	NA	cellular_component	NA	0	NA	0	0	EEA1	1	0
GO:0043306	positive regulation of mast cell degranulation	NA	NA	biological_process	NA	0.000968205	NA	0	0	LOC100476759	1	0
GO:0008191	metalloendopeptidase inhibitor activity	NA	NA	molecular_function	NA	0.00952199	NA	0	0	SPOCK3	1	0
GO:0007288	sperm axoneme assembly	NA	NA	biological_process	NA	0.00265811	NA	0	0	SPAG16	1	0
GO:0040012	regulation of locomotion	NA	NA	biological_process	NA	0.000968205	NA	0	0	LRRK2	1	0
GO:0005248	voltage-gated sodium channel activity	NA	NA	molecular_function	NA	0.00716639	NA	0	0	SCN3A	1	0
